1 **Non-medical prescribing policy in the United Kingdom**  
2 **National Health Service: systematic review and**  
3 **narrative synthesis**

4 Short title: Non-medical prescribing policy in the United Kingdom National Health  
5 Service

6 Emma Graham-Clarke<sup>1\*</sup>, Alison Rushton<sup>2</sup>, Timothy Noblet<sup>2,3</sup>, John Marriott<sup>1</sup>

7

8 <sup>1</sup>School of Pharmacy, Institute of Clinical Sciences, College of Medical and Dental  
9 Sciences, University of Birmingham, Birmingham, UK

10 <sup>2</sup>Centre of Precision Rehabilitation for Spinal Pain, School of Sport, Exercise and  
11 Rehabilitation Sciences, College of Life and Environmental Sciences, University of  
12 Birmingham, Birmingham, UK

13 <sup>3</sup>Physiotherapy Department, St George's University Hospitals NHS Foundation Trust

14

15 \* Corresponding author

16 E-mail: [EMG315@bham.ac.uk](mailto:EMG315@bham.ac.uk) (EGC)

17

## 18 **Abstract**

19 Non-medical prescribing was introduced into the United Kingdom (UK) to improve  
20 patient care, through extending healthcare professionals' roles. More recent  
21 government health service policy focuses on the increased demand and the need for  
22 efficiency. This systematic review aimed to describe any changes in government  
23 policy position and the role that non-medical prescribing plays in healthcare  
24 provision.

25 The systematic review and narrative analysis included policy and consultation  
26 documents that describe independent non-medical prescribing. A pre-defined  
27 protocol was registered with PROSPERO (CRD42015019786). Professional body  
28 websites, other relevant websites and the following databases were searched to  
29 identify relevant papers: HMIC, Lexis Nexis, UK Government Web Archive, UKOP, UK  
30 Parliamentary Papers and Web of Science. Papers published between 2006 and  
31 February 2018 were included.

32 Following exclusions, 45 papers were selected for review; 23 relating to policy or  
33 strategy and 22 to consultations. Of the former, 13/23 were published 2006-2010  
34 and the remainder since 2013. Two main themes are identified: chronological  
35 aspects and healthcare provision. The impact of government change and associated  
36 major healthcare service reorganisation resulted in the publication gap for policy  
37 documents. The role of non-medical prescribing has evolved to support efficient  
38 service delivery, and cost reduction. For many professions, prescribing appears

39 embedded into practice; however, pharmacy continues to produce policy  
40 documents, suggesting that prescribing is not yet perceived as normal practice.

41 Prescribing appears to be more easily adopted into practice where it can form part  
42 of the overall care of the patient. Where new roles are required to be established,  
43 then prescribing takes longer to be universally adopted. While this research concerns  
44 policy and practice in the UK, this aspect of role adoption has wider potential  
45 implications.

46

## 47 **Introduction**

48 Traditionally, prescribing of human medicines had been perceived as a medical role,  
49 with only medical professionals and dentists having full prescribing rights in the  
50 United Kingdom (UK). Two seminal reports challenged this view; the Cumberlege  
51 report [1] which paved the way for limited prescribing by health visitors and district  
52 nurses, and the Crown report [2], which recommended extending prescribing rights  
53 for the benefit of patients and to utilise the skills of healthcare professionals. The  
54 main UK healthcare provider, within which prescribers practice, is the National  
55 Health Service (NHS); established in 1948 to provide comprehensive healthcare to  
56 all, free at the point of delivery [3]. The UK also has a parallel smaller privately  
57 funded healthcare sector. Healthcare policy is directed by the UK government,  
58 reflecting the principles of the governing party at the time. Since 1948, this has been  
59 one of two main political parties (Labour, Conservative), apart from 2010-2015 when  
60 a Conservative and Liberal Democrat coalition was in power. As a general principle,  
61 Conservative governments tend to support free markets and expansion of the  
62 private sector, whereas Labour governments support the NHS over the private  
63 sector. Rising costs and changes in healthcare practice have led to numerous reforms  
64 since the NHS was founded but, irrespective of the political stance, the founding  
65 principles remain [3, 4].

66 In 2000 the governing Labour Party published a White Paper 'The NHS Plan', which  
67 described the government's intention to modernise healthcare services, breaking  
68 down the traditional demarcations between professions and introducing new ways

69 of working to increase healthcare capacity, shorten waiting times, and thus improve  
70 the patient experience [5]. Nurse prescribing was highlighted as one of the 10 key  
71 roles defined by the Chief Nursing Officer and the White Paper also included broad  
72 reference to therapists extending their roles, with prescribing included within this  
73 [5]. To support these sweeping changes to traditional practice the government  
74 established the Modernisation Agency, tasked with supporting service redesign at a  
75 local level [6], and launched a consultation on extending nurse prescribing [7]. This  
76 was followed in 2002 by a consultation on the introduction of supplementary  
77 prescribing for nurses and pharmacists [8], with approval granted later that year [9].

78 Supplementary prescribing is described as a voluntary partnership between the  
79 supplementary prescriber, the doctor looking after the patient, and the patient.  
80 Additionally, a supplementary prescriber can only prescribe medication listed in an  
81 agreed clinical management plan [10]. The first supplementary nurse prescribers  
82 qualified in 2003, with pharmacists following in 2004. It quickly became apparent  
83 that supplementary prescribing, whilst ideal for complex and long-term conditions,  
84 had significant limitations with regard to acute care, hampering the government's  
85 desire to enhance patient care through expanding nurse and pharmacist roles and  
86 hence improving access to medication. This was articulated clearly in the  
87 consultation documents launched in 2005 to investigate expansion into independent  
88 prescribing [11, 12]. Legislation to implement independent prescribing by nurses and  
89 pharmacists was enacted in 2006 [13], and since that time independent prescribing  
90 rights have been gradually extended to a range of healthcare professionals, most  
91 recently paramedics [14].

92 Non-medical prescribing (NMP) is the umbrella term used to cover prescribing by  
93 professions other than doctors. The initial focus of government policy with regard to  
94 NMP was the desire to improve patient access to medicines. However, more recent  
95 documents from NHS England have focused on the increased demand for services  
96 and the need to drive efficiency so that maximum benefit can be obtained from the  
97 limited NHS budget [15, 16]. The role of NMP has been less apparent in these later  
98 documents, and it is unclear if this reflects a change in government policy.

99 The present study aimed to conduct a systematic literature review investigating  
100 potential changes in UK Government policy position with regard to NMP, since the  
101 introduction of independent prescribing for nurses and pharmacists. The study also  
102 aimed to determine the current role of independent NMP in the delivery of  
103 healthcare in the NHS.

## 104 **Method**

### 105 **Protocol and registration**

106 A systematic review with narrative synthesis was conducted to explore the evolution  
107 of government policy concerning independent NMP in the UK. A predefined protocol  
108 was developed following the PRISMA-P statement [17] and registered with  
109 PROSPERO (CRD42015019786) (S1 Protocol). The results are reported following the  
110 PRISMA statement (S1 appendix) [18].

## 111 **Eligibility criteria**

112 Documents describing policy concerning independent NMP in the UK were included.  
113 These included White and Green papers, policy statements, consultation documents  
114 and reports. Documents published since 2006 were included, as the legislation  
115 permitting nurse and pharmacist independent prescribing was enacted in that year  
116 [13].

## 117 **Information sources**

118 Advice was taken from expert librarians regarding appropriate electronic databases  
119 and websites to search (listed in **Error! Reference source not found.**) and to aid  
120 development of search strategies. Broad search terms (e.g. prescribing, non-medical)  
121 were used to capture as wide a range of documents as possible. Boolean operators  
122 and truncation were used if the database supported them. Iterative and ‘snowball’  
123 search techniques were employed [19], with the primary searches complete to the  
124 end of February 2018, and secondary searches conducted as necessary (S2  
125 Appendix). Documents obtained were mapped to identify gaps (for example,  
126 documents relating to the consultation process or profession specific policy  
127 documents) enabling targeted secondary searches to be conducted. Relevant  
128 citations in the reviewed documents were also obtained and personal files searched  
129 [19]. Full texts of the selected documents were screened to remove those that did  
130 not meet the eligibility criteria.

Table 1. Databases and websites searched

| Databases and websites                                                         | Professional body websites                    |
|--------------------------------------------------------------------------------|-----------------------------------------------|
| Google Scholar                                                                 | Chartered Society of Physiotherapists         |
| HMIC - Ovid                                                                    | College of Optometrists                       |
| Lexis Nexis                                                                    | College of Paramedics                         |
| UK Government Web Archive                                                      | General Optical Council                       |
| UKOP (UK Official Publications)                                                | General Pharmaceutical Council                |
| UK Parliamentary Papers - ProQuest                                             | Health and Care Professions Council           |
| Web of Science                                                                 | Institute of Radiology                        |
| <a href="http://www.gov.uk">www.gov.uk</a>                                     | Nursing and Midwifery Council                 |
| <a href="http://www.health-ni.gov.uk">www.health-ni.gov.uk</a>                 | Royal College of Nursing                      |
| <a href="http://www.publications.scot.nhs.uk">www.publications.scot.nhs.uk</a> | Royal Pharmaceutical Society                  |
| <a href="http://www.scot.nhs.uk">www.scot.nhs.uk</a>                           | The Association of Ambulance Chief Executives |
| <a href="http://www.wales.nhs.uk">www.wales.nhs.uk</a>                         | The College of Podiatry                       |
|                                                                                | The Royal College of Radiologists             |

132

### 133 **Study selection**

134 Two reviewers (EGC and TN) independently conducted each stage, resolving  
135 differences by discussion, with a third reviewer (AR) available if required for  
136 mediation [20]. Numbers excluded were recorded [18, 20].



## 137 **Data collection process and data items**

138 Selected papers were entered into a Microsoft ® Excel for Mac (version 16)  
139 spreadsheet. Home nation and professions covered by the reference were noted,  
140 and whether the reference related to policy or consultation. The full texts were read,  
141 and notes made of any reference to NMP, including the context.

## 142 **Risk of bias assessment**

143 Unlike research papers, whether qualitative or quantitative in nature, policy and  
144 consultation documents are not developed according to well-recognised principles.  
145 Risk of bias assessment is therefore not appropriate for this type of document and  
146 was not conducted. Policy documents are liable to be biased towards the ethos of  
147 the government in power at the time and documents produced by profession  
148 specific bodies towards their profession. The results will be reported according to  
149 the relevant government era and, where appropriate, the specific professional body.

## 150 **Data syntheses**

151 Narrative synthesis was conducted on the selected documents [21, 22]. Following  
152 tabulation and data extraction, the selected documents were grouped depending on  
153 whether they concerned policy or consultation. To aid this process and to visualise  
154 the time distribution they were also plotted on a timeline, with a further timeline  
155 developed for the consultation documents. Using these techniques, a narrative

156 summary was able to be developed by one researcher (EGC), and the findings were  
157 then debated and critically assessed by all authors to reach agreement.

158 One of the authors (EGC) is a practising pharmacist independent prescriber and NMP  
159 lead for an acute trust. In this role they support other non-medical prescribers and  
160 have an interest in NMP developments. This researcher standpoint is balanced by  
161 the other authors, who do not have prescribing qualifications.

## 162 **Results**

### 163 **Paper selection and characteristics**

164 The search strategy identified 99 full text articles to be assessed for inclusion.

165 Following exclusions, 45 papers were included in the review (Fig 1).

#### 166 **Fig 1. PRISMA paper selection flow diagram**

167 Of the included papers, 23 relate to policy or strategic report documents (see **Error!**

168 **Reference source not found.**), and 22 to the consultation process concerning

169 extension of independent NMP responsibilities to various healthcare professions

170 (see **Error! Reference source not found.**).

171

Table 2. Policy and Strategic Report Documents

| Title                                                                                                                                               | Source                               | Date   | Home Nation    | Professional Group |            |                 |            |           |              |             |     |     |  |
|-----------------------------------------------------------------------------------------------------------------------------------------------------|--------------------------------------|--------|----------------|--------------------|------------|-----------------|------------|-----------|--------------|-------------|-----|-----|--|
|                                                                                                                                                     |                                      |        |                | Nurse              | Pharmacist | Physiotherapist | Podiatrist | Paramedic | Radiographer | Optometrist | AHP | NMP |  |
| <b>Improving Patients' Access to Medicines: A Guide to Implementing Nurse and Pharmacist Independent Prescribing within the NHS in England [23]</b> | Department of Health                 | Apr-06 | England        | Y                  | Y          |                 |            |           |              |             |     |     |  |
| <b>Medicines Matters. A guide to mechanisms for the prescribing, supply and administration of medicines [24]</b>                                    | Department of Health                 | Jul-06 | United Kingdom | Y                  | Y          |                 |            |           |              | Y           |     |     |  |
| <b>Guidance for Nurse Independent Prescribers and for Community</b>                                                                                 | Scottish Executive Health Department | Aug-06 | Scotland       | Y                  |            |                 |            |           |              |             |     |     |  |

|                                                                                                                                                               |                                                                                                    |        |                  |   |   |  |  |  |  |  |  |
|---------------------------------------------------------------------------------------------------------------------------------------------------------------|----------------------------------------------------------------------------------------------------|--------|------------------|---|---|--|--|--|--|--|--|
| <b>Practitioner Nurse Prescribers in Scotland: A Guide for Implementation [25]</b>                                                                            |                                                                                                    |        |                  |   |   |  |  |  |  |  |  |
| <b>Improving Patients' Access to Medicines: A Guide to Implementing Nurse and Pharmacist Independent Prescribing within the HPSS in Northern Ireland [26]</b> | Department of Health Social Services and Public Safety                                             | Dec-06 | Northern Ireland | Y | Y |  |  |  |  |  |  |
| <b>The best medicine: the management of medicines in acute and specialist trusts [27]</b>                                                                     | Commission for Healthcare Audit and Inspection                                                     | Jan-07 | England          | Y | Y |  |  |  |  |  |  |
| <b>Mental Health: New Ways of Working for Everyone. Progress Report [28]</b>                                                                                  | Department of Health, National Institute for Mental Health in England National Workforce Programme | Apr-07 | England          | Y |   |  |  |  |  |  |  |

|                                                                                                                                             |                                                                                                             |        |          |   |   |   |   |  |   |  |   |   |
|---------------------------------------------------------------------------------------------------------------------------------------------|-------------------------------------------------------------------------------------------------------------|--------|----------|---|---|---|---|--|---|--|---|---|
| <b>Non medical prescribing in Wales - A guide for implementation [29]</b>                                                                   | Welsh Assembly<br>Government                                                                                | Jul-07 | Wales    | Y | Y |   |   |  |   |  |   |   |
| <b>New Ways of Working for Everyone: A best practice implementation guide [30]</b>                                                          | Department of Health,<br>National Institute for Mental<br>Health in England National<br>Workforce Programme | Oct-07 | England  |   |   |   |   |  |   |  |   | Y |
| <b>Consultation on A Safe Prescription: Developing Nurse, Midwife and Allied Health Profession (NMAHP) Prescribing in NHS Scotland [31]</b> | The Scottish Government,<br>Primary Care Division                                                           | Nov-07 | Scotland | Y |   |   |   |  |   |  | Y |   |
| <b>Pharmacy in England: Building on strengths – delivering the future (Cm 7341) [32]</b>                                                    | Department of Health                                                                                        | Apr-08 | England  |   | Y |   |   |  |   |  |   |   |
| <b>Allied health professions prescribing and medicines supply mechanisms scoping project report [33]</b>                                    | Department of Health                                                                                        | Jul-09 | England  |   |   | Y | Y |  | Y |  |   |   |

|                                                                                                                             |                                  |        |                |   |   |  |  |   |  |  |   |  |
|-----------------------------------------------------------------------------------------------------------------------------|----------------------------------|--------|----------------|---|---|--|--|---|--|--|---|--|
| <b>A safe prescription; Developing nurse, midwife and allied health profession (NMAHP) prescribing in NHS Scotland [34]</b> | The Scottish Government          | Sep-09 | Scotland       | Y |   |  |  |   |  |  | Y |  |
| <b>Pharmacist Prescriber Training Working Group Report for the MPC Programme Board [35]</b>                                 | Medical Education England        | Jan-10 | England        |   | Y |  |  |   |  |  |   |  |
| <b>Prescription for Excellence [36]</b>                                                                                     | The Scottish Government          | Sep-13 | Scotland       |   | Y |  |  |   |  |  |   |  |
| <b>Now or never: shaping pharmacy for the future [37]</b>                                                                   | The Royal Pharmaceutical Society | Nov-13 | England        |   | Y |  |  |   |  |  |   |  |
| <b>Seven Day Services in Hospital Pharmacy: Giving patients the care they deserve [38]</b>                                  | The Royal Pharmaceutical Society | Jun-14 | United Kingdom |   | Y |  |  |   |  |  |   |  |
| <b>Our Plan for Primary Care in Wales up to March 2018 [39]</b>                                                             | Welsh Assembly, NHS Wales        | Nov-14 | Wales          | Y | Y |  |  | Y |  |  |   |  |

|                                                                                                                                                                            |                                  |        |                |   |   |   |  |  |  |   |  |  |
|----------------------------------------------------------------------------------------------------------------------------------------------------------------------------|----------------------------------|--------|----------------|---|---|---|--|--|--|---|--|--|
| <b>A Planned Primary Care Workforce for Wales: Approach and development actions to be taken in support of the plan for a primary care service in Wales up to 2018 [39]</b> | Welsh Assembly, NHS Wales        | Jun-15 | Wales          | Y | Y | Y |  |  |  | Y |  |  |
| <b>The future of primary care: Creating teams for tomorrow [40]</b>                                                                                                        | Health Education England         | Jul-15 | United Kingdom | Y | Y | Y |  |  |  |   |  |  |
| <b>Transformation of seven day clinical pharmacy services in acute hospitals [41]</b>                                                                                      | NHS England                      | Sep-16 | England        |   | Y |   |  |  |  |   |  |  |
| <b>Improving care for people with Long Term Conditions [42]</b>                                                                                                            | The Royal Pharmaceutical Society | Nov-16 | England        |   | Y |   |  |  |  |   |  |  |
| <b>The General Practice Nursing Workforce Development Plan [43]</b>                                                                                                        | Health Education England         | Mar-17 | England        | Y |   |   |  |  |  |   |  |  |

|                                                                                                                          |                       |        |         |   |   |  |  |  |  |  |  |  |
|--------------------------------------------------------------------------------------------------------------------------|-----------------------|--------|---------|---|---|--|--|--|--|--|--|--|
| <b>Facing the Facts, Shaping the Future:<br/>A draft health and care workforce<br/>strategy for England to 2027 [44]</b> | Public Health England | Dec-17 | England | Y | Y |  |  |  |  |  |  |  |
|--------------------------------------------------------------------------------------------------------------------------|-----------------------|--------|---------|---|---|--|--|--|--|--|--|--|

AHP – allied health professional      NMP – Non-medical prescriber

Table 3. Consultation Documents

| Title                                                                                                    | Source                                                     | Date   | Home Nation    | Professional Group |            |                 |            |           |              |             |
|----------------------------------------------------------------------------------------------------------|------------------------------------------------------------|--------|----------------|--------------------|------------|-----------------|------------|-----------|--------------|-------------|
|                                                                                                          |                                                            |        |                | Nurse              | Pharmacist | Physiotherapist | Podiatrist | Paramedic | Radiographer | Optometrist |
| <b>Consultation on proposals to introduce independent<br/>prescribing by optometrists (MLX 334) [45]</b> | Medicines &<br>Healthcare<br>Products<br>Regulatory Agency | Aug-06 | United Kingdom |                    |            |                 |            |           |              | Y           |



|                                                                                                                                               |                                                   |        |                |   |   |   |   |   |  |   |
|-----------------------------------------------------------------------------------------------------------------------------------------------|---------------------------------------------------|--------|----------------|---|---|---|---|---|--|---|
| <b>Public consultation - independent prescribing of controlled drugs by nurse and pharmacist independent prescribers (MLX338) [46]</b>        | Home Office, Drug Strategy Unit                   | Mar-07 | United Kingdom | Y | Y |   |   |   |  |   |
| <b>Public consultation (MLX 334): Proposals to introduce independent prescribing by optometrists – outcome [47]</b>                           | Medicines & Healthcare Products Regulatory Agency | Aug-08 | United Kingdom |   |   |   |   |   |  | Y |
| <b>Proposals to introduce prescribing responsibilities for paramedics: stakeholder engagement [48]</b>                                        | Department of Health                              | Mar-10 | United Kingdom |   |   |   |   | Y |  |   |
| <b>Engagement exercise: To seek views on possibilities for introducing independent prescribing responsibilities for podiatrists [49]</b>      | Department of Health                              | Sep-10 | United Kingdom |   |   |   | Y |   |  |   |
| <b>Engagement exercise: To seek views on possibilities for introducing independent prescribing responsibilities for physiotherapists [50]</b> | Department of Health                              | Sep-10 | United Kingdom |   |   | Y |   |   |  |   |

|                                                                                                                   |                               |        |                |  |  |   |   |  |   |  |
|-------------------------------------------------------------------------------------------------------------------|-------------------------------|--------|----------------|--|--|---|---|--|---|--|
| <b>Proposals to introduce independent prescribing by podiatrists: impact assessment [51]</b>                      | Department of Health          | Jul-11 | United Kingdom |  |  |   | Y |  |   |  |
| <b>Consultation on proposals to introduce independent prescribing by podiatrists [52]</b>                         | Department of Health          | Sep-11 | United Kingdom |  |  |   | Y |  |   |  |
| <b>Consultation on proposals to introduce independent prescribing by physiotherapists [53]</b>                    | Department of Health          | Sep-11 | United Kingdom |  |  | Y |   |  |   |  |
| <b>Summary of the Commission on Human Medicines meeting held on Thursday 17th &amp; Friday 18th May 2012 [54]</b> | Commission on Human Medicines | May-12 | United Kingdom |  |  | Y | Y |  |   |  |
| <b>Summary of Public Consultation on Proposals to Introduce Independent Prescribing by Physiotherapists [55]</b>  | Department of Health          | Jul-12 | United Kingdom |  |  | Y |   |  |   |  |
| <b>Proposals to introduce independent prescribing by physiotherapists: impact assessment [56]</b>                 | Department of Health          | Jul-12 | United Kingdom |  |  | Y |   |  |   |  |
| <b>Summary of Public Consultation on Proposals to Introduce Independent Prescribing by Podiatrists [57]</b>       | Department of Health          | Jul-12 | United Kingdom |  |  |   | Y |  |   |  |
| <b>Independent prescribing by radiographers: Impact Assessment [58]</b>                                           | NHS England                   | Jan-15 | United Kingdom |  |  |   |   |  | Y |  |

|                                                                                                                                                              |                               |        |                |  |  |  |  |   |   |  |
|--------------------------------------------------------------------------------------------------------------------------------------------------------------|-------------------------------|--------|----------------|--|--|--|--|---|---|--|
| <b>Consultation on proposals to introduce independent prescribing by radiographers across the United Kingdom [59]</b>                                        | NHS England                   | Feb-15 | United Kingdom |  |  |  |  |   | Y |  |
| <b>Consultation on proposals to introduce independent prescribing by paramedics across the United Kingdom [60]</b>                                           | NHS England                   | Feb-15 | United Kingdom |  |  |  |  | Y |   |  |
| <b>Proposal to introduce independent prescribing by paramedics: impact assessment [61]</b>                                                                   | NHS England                   | Feb-15 | United Kingdom |  |  |  |  | Y |   |  |
| <b>Commission on Human Medicines and Expert Advisory Group Final Summary Minutes [62]</b>                                                                    | Commission on Human Medicines | Oct-15 | United Kingdom |  |  |  |  | Y | Y |  |
| <b>Independent prescribing by therapeutic radiographers [63]</b>                                                                                             | NHS England                   | Jan-16 | United Kingdom |  |  |  |  |   | Y |  |
| <b>Summary of the responses to the public consultation on proposals to introduce independent prescribing by paramedics across the United Kingdom [64]</b>    | NHS England                   | Feb-16 | United Kingdom |  |  |  |  | Y |   |  |
| <b>Summary of the responses to the public consultation on proposals to introduce independent prescribing by radiographers across the United Kingdom [65]</b> | NHS England                   | Feb-16 | United Kingdom |  |  |  |  |   | Y |  |

|                                                                                                          |                                  |        |                |  |  |  |   |  |  |  |
|----------------------------------------------------------------------------------------------------------|----------------------------------|--------|----------------|--|--|--|---|--|--|--|
| <b>Summary of the Commission on Human Medicines meeting<br/>held on Thursday 7th September 2017 [66]</b> | Commission on<br>Human Medicines | Sep-17 | United Kingdom |  |  |  | Y |  |  |  |
|----------------------------------------------------------------------------------------------------------|----------------------------------|--------|----------------|--|--|--|---|--|--|--|

172 The policy and strategic report documents relate to a single profession (nursing 3,  
173 pharmacy 7), multiple professions (12), or generic NMP (one). The majority concern  
174 matters in the home nations (England 12, Scotland 4, Wales 3 and Northern Ireland  
175 1) with only 3 concerning the United Kingdom. They can be divided into two  
176 chronological eras, with just over half published between 2006 and 2010, and the  
177 remainder published since 2013 (Fig 2).

## 178 **Fig 2. Timeline of selected documents**

179 Policy – black, Optometrist – brown, Radiographer – purple, Nurse/Pharmacist – yellow, Paramedic –  
180 blue, Podiatrist – red, Physiotherapist- green

## 181 **Synthesis of results**

### 182 **The Labour Government era 2006-2010**

183 Four of the early documents comprised guidance issued by the home nations to  
184 support NMP. These were released as the relevant regulations governing prescribing  
185 were amended to permit independent NMP. The first was released by the  
186 Department of Health in April 2006, coinciding with the initial changes in legislation  
187 and regulations permitting independent prescribing by nurses and pharmacists [13,  
188 23, 67]. This was followed by Scotland’s guidance, released in July 2006, Northern  
189 Ireland’s guidance in December 2006 and the Welsh guidance in 2007 [25, 26, 29].  
190 All four documents are similar in nature; however, Scotland’s relates to nurse  
191 prescribing only whereas the other three relate to nurse and pharmacist prescribing.  
192 This reflects the changes made by the home nations whereby England, Wales and

193 Northern Ireland each introduced nurse and pharmacist independent prescribing  
194 simultaneously, whereas Scotland introduced nurse independent prescribing first,  
195 followed a year later by pharmacist independent prescribing. Although the bulk of  
196 these documents relates to practical implementation guidance, each states the core  
197 policy drivers behind NMP which were:

- 198 • improving patient care, without reducing safety
- 199 • making it easier to patients to access the medicines they require
- 200 • increasing patient choice
- 201 • utilising the skills of health professionals
- 202 • supporting team working

203 The Welsh guidance included the additional benefits of improving healthcare  
204 capacity and enhancing patient access for advice and services.

205 Scotland conducted a prescribing strategy consultation exercise, with the final  
206 strategy launched in 2009 [31, 34]. These documents covered independent  
207 prescribing by nurses and midwives and supplementary prescribing by allied health  
208 professionals but not pharmacist prescribers. They highlighted the variable adoption  
209 of NMP across Scotland and had the aim of improving uptake of NMP to support the  
210 NHS boards in delivering patient centred care.

211 The remaining prescribing specific documents in this era were the scoping report on  
212 Allied Health Professional (AHP) prescribing and a report on pharmacist prescribing  
213 training [33, 35]. The former reviewed the developing role of AHPs and highlighted  
214 some of the limitations resulting from their inability to prescribe; identifying which

215 professions would benefit most from the ability to prescribe, either independently or  
216 as a supplementary prescriber, and also which professions should not become  
217 prescribers. Additionally, the professions were prioritised, with physiotherapy and  
218 podiatry identified as high priorities for independent prescribing, followed by  
219 radiology. The latter document reviewed pharmacist prescribing experiences and  
220 recommended several changes to training, both at undergraduate level and  
221 regarding the prescribing course.

222 The remaining documents produced in this era, although generic in nature, include  
223 references to NMP. The first was a Department of Health document released in 2006  
224 providing further guidance on medicine supply and reiterating the drive behind NMP  
225 [24]. The document included several proposed next stages for NMP:

- 226 • To consult on optometrist independent prescribing
- 227 • To promote nurse and pharmacist independent prescribing
- 228 • To review the prescribing needs of emerging roles

229 This was followed by the Audit Commission report in 2007 on medicines  
230 management, which mentioned the development of nurse and pharmacist  
231 prescribing and described the distribution of prescribers at that time [27]. Data  
232 collection had been in 2005 and 2006 and therefore the majority of these data  
233 would have been collected from supplementary prescribers. They recommended  
234 that trusts identify where NMP would provide the maximum benefit clinically and  
235 that work should be performed to identify why some non-medical prescribers did  
236 not prescribe regularly.

237 The “New Ways of Working in Mental Health” project released two documents in  
238 2007, a progress report and an implementation guide [28, 30]. The progress report  
239 reiterated the five core drivers behind NMP and described how NMP should be  
240 incorporated into the changes in working practice such as multidisciplinary team  
241 working. The implementation guide provided theoretical examples of changed  
242 practice which incorporated NMP.

243 The final document in this era was the pharmacy White Paper [32]. This highlighted  
244 the roles that pharmacists could play in improving the healthcare of patients,  
245 including the example of prescribing in long-term conditions. Although some case  
246 studies were described, most of the suggested roles for prescribers were  
247 aspirational.

#### 248 **The Coalition and Conservative Governments era 2013-2017**

249 The first two documents in this era both concerned the role of pharmacy in  
250 providing patient centred health care. The first of these was the Scottish  
251 Government’s vision for pharmacy which envisaged integration of pharmacists into  
252 all aspects of healthcare [36]. Central to this vision was the aim of having all  
253 pharmacists qualified as independent prescribers. The second document was a  
254 report by the Royal Pharmaceutical Society on pharmacy activity and future  
255 potential [37]. Various examples of prescribing practice are described but the  
256 comment is made that it is not sufficient simply to provide prescribing courses, that  
257 roles must also be developed that utilise this skill. The report contrasts the English



258 and Scottish governments approach to pharmacy, to the detriment of the English  
259 government's approach.

260 There are three further pharmacy specific documents in this era, with two of these  
261 concerning seven-day hospital pharmacy services. The first was a report by the Royal  
262 Pharmaceutical Society discussing potential approaches to providing a seven-day  
263 service and the associated challenges [38]. Examples where seven-day pharmacy  
264 services had been implemented were given, with many of the contributors  
265 anticipating the use of pharmacist prescribers to support delivery. The second  
266 report, from NHS England, describes the need to deliver clinical pharmacy services  
267 seven days a week, highlighting the impact that pharmacy services make and  
268 describing the importance of prescribing to support the multi-professional team  
269 [41]. The final pharmacy specific document was the Royal Pharmaceutical Society  
270 produced policy paper, concerning care for patients with long-term conditions [42].  
271 This highlights the role that pharmacists can play in supporting these patients, and  
272 makes a number of key recommendations, the first of which is that pharmacists  
273 should have the opportunity to become prescribers.

274 The Welsh Assembly produced a plan for primary care in 2014, followed by a primary  
275 care workforce development plan in 2015 [39, 68]. The first of these documents  
276 highlighted the increasing pressure on general practice from a combination of  
277 increasing demand, a shortage of general practitioners and financial constraints. The  
278 focus was on health rather than ill-health and to provide person centred care within  
279 the local community, using the most appropriate healthcare professional for the  
280 task. Advanced practice such as NMP was seen to relieve pressure on general

281 practitioners. The associated workforce plan described the potential role of NMP for  
282 various professions and provided examples.

283 A Health Education England commissioned report on primary care, published in  
284 2015, described how primary care could be delivered using a wide range of  
285 healthcare professionals [40]. Included in the recommendations was the role of the  
286 prescribing pharmacist, and the potential for physiotherapist prescribers. This was  
287 followed in 2017 by the general practice nursing workforce plan [43]. Prescribing is  
288 described as complementing the nursing role, but challenges are acknowledged  
289 particularly in enabling time for training. Finally, there was the draft workforce  
290 strategy for England which was released for consultation in December 2017 [44].  
291 This specifically mentioned prescribing in the pharmacy section and also commented  
292 that increased numbers of nurse prescribers would be required in the community  
293 and primary-care sectors. No mention was made of prescribing by any other non-  
294 medical healthcare professional.

## 295 **Consultation documents**

296 Two consultations were launched during the period 2006-2008; the first concerned  
297 the introduction of independent prescribing for optometrists, and the second  
298 regarding controlled drug prescribing by nurse and pharmacist independent  
299 prescribers. The consultation process for the introduction of independent  
300 prescribing by optometrists was launched in August 2006, with the outcome  
301 announced in 2008, and associated legislation passed the same year [45, 47, 69].  
302 This time period contrasts with the second consultation in 2007 on controlled drug

303 prescribing, where agreement that this should be permitted was reached, but  
304 changes in legislation were not enacted until 2012 [46, 70, 71].

305 Following the 2009 AHP scoping report, stakeholder engagement exercises were  
306 launched in 2010 to investigate independent prescribing rights for both podiatry and  
307 physiotherapy, followed by consultation exercises in 2011 and the outcome and  
308 approval in 2012, the whole process taking a little under two years [49-57]. The  
309 consultation for radiographers was launched in 2015 with approval, for therapeutic  
310 radiographers only, granted in 2016 (diagnostic radiographers were excluded) [58,  
311 59, 62, 63, 65]. These relatively short consultation exercises contrast strongly with  
312 that of the paramedics. The initial document mentioning paramedic prescribing was  
313 published in 2005 [72], with the stakeholder engagement exercise held in 2010, a  
314 year before that of the podiatrists and physiotherapists [48-50]. The potential for  
315 paramedic prescribing was reiterated in the 2013 urgent care report, which  
316 described the changing role of paramedics, and the potential for further role  
317 extension [73]. The paramedic and radiographer consultation exercises ran  
318 simultaneously, but final approval for paramedics was only granted in 2017 [60, 61,  
319 64, 66, 74]. A comment is made in the related paramedic impact assessment that the  
320 consultation exercise was delayed because of capacity issues [61]. The relative  
321 timescales are visually depicted in Fig 3.

322 **Fig 3. Consultation Timeline**

## 323 **Discussion**

### 324 **Summary of evidence**

325 This is the first such review bringing together the UK policy documents concerning  
326 NMP to describe the role of this evolving skill. Review of the evidence reveals two  
327 main themes, which are expanded on below. The first theme highlights issues arising  
328 from inspecting the chronological aspects of the selected documents. The second  
329 theme covers the evolving approach to healthcare provision and describes how NMP  
330 has become embedded into routine practice for many non-medical prescribers.  
331 However, differences in practice remain and these are highlighted.

### 332 **Chronological aspects**

333 Inspection of the timeline of included papers reveals a noticeable gap between 2010  
334 and 2013, when no reports or strategic documents concerning NMP were released  
335 by a government body. The beginning of this period coincides with the change in  
336 government in 2010 from Labour to the Coalition. Two factors are likely to be  
337 responsible for this dearth of publications. Firstly, the Coalition embarked on an  
338 overall reorganisation of the NHS in England, initiated in the 2010 White Paper  
339 'Equity and Excellence', and enacted through the Health and Social Care Act in 2012  
340 [75, 76]; focussing on the high level structure rather than finer detail. Secondly, the  
341 country had been in economic recession since 2008 and the Coalition's 2010 budget  
342 introduced austerity measures designed to reduce the nation's budget deficit and  
343 improve economic growth [77, 78]. The government attempted to protect the NHS

344 from financial cuts implemented more generally across all services, however the  
345 funding growth rate for the NHS in England was curtailed to 1.4% a year compared  
346 with 6% a year under the previous Labour government [79]. Government priorities  
347 were therefore concerned with major reform of the NHS structure and introduction  
348 of commissioning groups, rather than the continued development of existing  
349 practices.

350 The change in government also probably explains the delay in extending controlled  
351 drug prescribing for nurses and pharmacist independent prescribers. Extending  
352 controlled drug prescribing rights requires the agreement of the Department of  
353 Health, the Home Office, the Medicines and Healthcare Products Regulatory Agency  
354 and the Advisory Council on the Misuse of Drugs (ACMD), and, subsequently,  
355 amendments to the Misuse of Drugs Regulations 2001 and medicines legislation  
356 [46]. The consultation closed in June 2007, and in November 2007 the ACMD wrote  
357 to the Under-Secretary of State at the Home Office, and the Minister of State for  
358 Public Health at the Department of Health, to support the proposals and the change  
359 in legislation [80]. However, the required change in legislation was only enacted in  
360 2012, and it can be surmised that with the Coalition's priorities focused on  
361 reorganisation of the whole NHS, extending controlled drug prescribing to nurse and  
362 pharmacist independent prescribers was accorded low priority [70, 71].

363 The consultation processes for the AHPs (physiotherapists, podiatrists and  
364 radiographers) were all concluded within a reasonable timeframe, despite the  
365 change in government occurring between publication of the AHP scoping report and  
366 initiation of the physiotherapy and podiatry consultation exercises [33, 49, 50]. The

367 AHP scoping report had demonstrated a clear role for prescribing for each of these  
368 professions in streamlining and improving patient care. In addition, the report  
369 prioritised which professions should be considered first, taking into consideration  
370 the strength of case for prescribing for each profession and the capacity of the  
371 Department of Health and Medicines and Healthcare Products Regulatory Agency to  
372 conduct the necessary consultations. As an aside, the consultation exercises reflect  
373 the NHS reorganisation, with the physiotherapy and podiatry consultation exercises  
374 conducted under the auspices of the Department of Health, and subsequent  
375 consultation exercises under NHS England.

376 In comparison, the lack of clarity concerning how prescribing would be utilised by  
377 paramedics, and their evolving role, explains the extended time period between the  
378 initial recommendation regarding paramedic independent prescribing and final  
379 approval. At the time of the initial report paramedics had recently become  
380 registered with the Health Care Professions Council, and the NHS advanced practice  
381 role was developing [72]. Consequently, the training focus shifted from resuscitation,  
382 to assessing and treating the patient at home. By the time of the urgent care report  
383 in 2013, treatment by a paramedic at home was considered an essential component  
384 of the strategy to reduce demand on emergency care services [73]. Furthermore,  
385 when the formal consultation process began, advanced paramedics had started to  
386 work in a range of settings such as emergency care departments as well as the more  
387 traditional ambulance service. Following the consultation, the Commission on  
388 Human Medicines (CHM) was unable to recommend prescribing by paramedics  
389 because of concern that paramedics would need training in a large range of

390 conditions to ensure patient safety [62]. The minutes for the 2017 CHM meeting  
391 simply say that they endorse the recommendations for independent prescribing for  
392 paramedics, and it is to be presumed that they had been provided with reassurance  
393 concerning the training and role of paramedics [66].

#### 394 **Healthcare provision - evolution of policy**

395 The five drivers for prescribing documented in the implementation guidance  
396 reiterated the aims of the 2000 NHS White Paper to improve patient care and break  
397 down the traditional demarcations between professions [5, 23, 25, 26, 29]. These  
398 and other early documents such as the “Medicines Matters, and the Mental Health  
399 New Ways of Working” project were published before full independent prescribing  
400 was embedded [24, 28, 30]. As such, they discuss the potential for NMP to improve  
401 patient care and, in particular with the mental health documents, develop new ways  
402 of working. Medicines Matters explicitly commented that NMP was unsuitable for  
403 patients with complex conditions, recommending the use of supplementary  
404 prescribing instead [24]. The pharmacy White Paper listed prescribing as one of the  
405 activities that pharmacists could undertake including the care of long-term  
406 conditions but many of the examples are theoretical [32]. The 2009 AHP scoping  
407 report highlights the changing role of, for example physiotherapists or podiatrists,  
408 commenting that they may now be responsible for a full package of patient care but  
409 were hampered by the inability to prescribe independently [33]. Again, this  
410 document describes potential or theoretical benefits.

411 However, when the Scottish government published their NMP strategy, they were  
412 able to draw on a number of published papers providing evidence of the benefits  
413 [34], although in reality the only full independent prescribers included were nurses.  
414 Likewise the pharmacist prescriber training report in 2010 was also able to draw on  
415 practice examples to illustrate various different ways that independent prescribing  
416 had been implemented [35].

417 The 2010 White Paper 'Equity and excellence: liberating the NHS' signalled a change  
418 in direction for the health service, putting the patient at the centre of care with '*no*  
419 *decision about me without me*' [75] but without the previous emphasis on workforce  
420 development; a point highlighted in a later staffing report [81]. The need for  
421 responsive and patient centred care, within the constraints of limited finances, was  
422 further developed in the subsequent Five-Year Forward View [16]. This document  
423 sets the need to provide more integrated care, giving patients greater control,  
424 against the background of increasing demand, rising costs resulting from new  
425 technologies, and budgetary constraints. Although prescribing is not specifically  
426 mentioned, there is a call to challenge traditional ways of working and to use the  
427 most appropriate healthcare professional for the task in hand.

428 This approach is echoed by the Welsh Assembly primary care plan, which describes a  
429 future model of primary-care in which the general practitioner acts as the leader  
430 over a multi professional team, who between them care for the patient [39]. The  
431 Welsh Assembly associated workforce development plan depends on other  
432 healthcare professionals taking on roles traditionally associated with general  
433 practitioners or secondary care, highlighting this with numerous examples of



434 healthcare professionals taking on new or advanced roles [68]. One such example is  
435 the monitoring of low risk glaucoma patients by optometrists, and the document  
436 comments that there will be an increased need for optometrists to train as  
437 prescribers as they develop these advanced roles. NMP is perceived as integral to  
438 these developments. The English primary care report [40] describes a number of  
439 approaches to reducing the burden on general practitioners. Included in this are new  
440 models of practice such as the work of physicians' associates, but as The Health  
441 Foundation comments, their role in relieving pressure on doctors will be limited if  
442 they are unable to prescribe [81]. The primary care report also describes prescribing  
443 in relation to physiotherapists, who are able to provide streamlined care for  
444 patients, and pharmacists to support their medicines optimisation activities, such as  
445 review of patients at risk of polypharmacy and adverse drug events [40]. Nurse  
446 prescribing is not specifically mentioned, although the report does identify that  
447 nurses have many responsibilities, including the care of patients with long-term  
448 conditions. More recently, the draft workforce strategy describes advanced practice  
449 for a number of professions such as nursing and paramedics but does not define  
450 what this entails [44]. It also describes podiatry and physiotherapy being potential  
451 first contact points for patients with musculoskeletal disorders. Prescribing would  
452 support all of these activities but is not explicitly mentioned and it could be  
453 perceived that NMP is seen to be so routine and embedded in practice for these  
454 professions that it warrants no mention. This compares with the pharmacy situation,  
455 where the same document put pharmacist independent prescribing as one of the  
456 priority areas to address and describes a project to put advanced pharmacists with  
457 prescribing skills into emergency departments. Other reports also make explicit

458 mention of pharmacy prescribing as one of the tools to enhance medicines  
459 optimisation practices [41, 42] suggesting that pharmacist prescribing is still not  
460 embedded into routine practice.

461 A review of the professional distribution of policy documents supports this  
462 supposition concerning NMP becoming routine practice, with the majority involving  
463 generic NMP or covering multiple NMP professions (see **Error! Reference source not**  
464 **found.**). Of the three nursing specific policy documents, two date from before 2010,  
465 and the final one from 2017 [25, 28, 43]. Pharmacy alone of the professions is  
466 associated with multiple policy documents since 2013; with three by the Royal  
467 Pharmaceutical Society and one by each of the Scottish government and NHS  
468 England [36-38, 41, 42]. Similar recent policy documents were unable to be  
469 identified for any other of the NMP professions, despite in-depth searching. This may  
470 reflect the need for pharmacists to develop new roles and skills as the traditional  
471 dispensing role diminishes as a consequence of technological advances such as  
472 electronic prescribing and robotic dispensing. With medicines central to pharmacy  
473 practice, it is appropriate that these roles support medicines optimisation; however,  
474 these are not existing roles that a pharmacist can move into, rather they are roles  
475 that require creating. The pharmacy orientated policy documents are required to  
476 describe to both pharmacists and commissioners how pharmacist prescribing could  
477 work in practice. This compares with other healthcare professions, such as  
478 physiotherapy, where medicines formed an adjunct to their main practice area  
479 allowing roles to be expanded. Pharmacy could also be perceived to be an innately

480 conservative profession, and the policy documents would thus serve to overcome a  
481 reluctance to adopt innovative working practices.

482 It is notable that there has been a shift regarding the role that NMP plays in the care  
483 of patients. The 2006 document, Medicines Matters, envisaged independent  
484 prescribers utilising a comparatively small personal formulary of drugs, which  
485 excluded controlled drugs and unlicensed medicines, to treat uncomplicated  
486 conditions [24]. Since independent prescribing for nurses and pharmacists was  
487 launched, their prescribing rights have been gradually extended to include  
488 unlicensed medicines and controlled drugs [46, 82] and more recent documents  
489 describe the role NMP has in the care of long-term conditions and complex patients  
490 [40, 42]. This is echoed by the changing role of medical staff in patient care. The  
491 early implementation guidance described medical staff retaining an overview of  
492 patient care, with nurse and pharmacist prescribing intended to improve patients  
493 access to medicines [23, 25, 26, 29]. Subsequent consultation processes (podiatry,  
494 physiotherapy, radiography and paramedics) have seen a change such that examples  
495 given in these documents describe the provision of a complete package of care  
496 without the need to involve other healthcare professionals. Indeed, the consequent  
497 reduction in costs through reducing appointments is listed as a benefit in the impact  
498 assessments [51, 56, 58, 61]. More recently, the Health Education England primary  
499 care report envisages that general practitioners will be treating patients with  
500 complex conditions, with other healthcare professionals providing routine care [40].

## 501 **Strengths and limitations**

502 The strengths of the present review include the systematic, iterative approach to  
503 identifying relevant documents, using document mapping techniques to identify  
504 gaps in the evidence. The dynamic nature of this healthcare area inevitably means  
505 that this review provides a snapshot of the situation between 2006 and 2018, which  
506 may well be superseded by unanticipated developments. The selected papers relate  
507 to the UK and the devolved nations only and this may limit generalisability to other  
508 countries. Additionally, although the legislation permits the use of NMP in UK private  
509 healthcare, the policy documents concern the use of NMP in the NHS and this may  
510 further limit generalisability for alternative healthcare systems.

511 Despite extensive searches there may well be further policy documents available,  
512 such as from the home nations or professional bodies that are not identifiable  
513 through a search strategy.

## 514 **Conclusions**

515 In conclusion it can be seen that this review has revealed that the government  
516 approach to NMP has changed over the 12 year period from 2006. Although  
517 originally intended as a means of improving patient choice and access to medicines,  
518 the emphasis has subtly changed to NMP supporting medical practitioners and  
519 reducing costs. Patients are expected to be cared for, and treated by, the most  
520 appropriate health care professional such as a physiotherapist for a musculoskeletal  
521 problem. This frees medical time, allowing medical practitioners to treat more

522 complex cases. Costs are reduced by streamlining care through reducing multiple  
523 appointments with different healthcare professionals, and by using the most  
524 appropriately qualified professional.

525 This review has also highlighted the role that NMP now plays in patient care, with  
526 prescribing perceived as one skill in the advanced practice armamentarium used to  
527 treat and support patients, enabling patients to benefit from receiving a complete  
528 package of care from a single healthcare professional. As prescribing has become  
529 embedded into day to day practice for the majority of the NMP professions, so the  
530 need to highlight prescribing in policy documents has diminished (as seen in the  
531 recent workforce development document), just as it is no longer felt necessary to  
532 describe in detail advanced practice in these professions. As new models of practice  
533 are developed, such as use of physician's associates, so the demand for NMP to  
534 expand to other healthcare professional groups continues, with the implication that  
535 prescribing is integral to these roles.

536 However, this review has found that while NMP has become embedded into routine  
537 practice for many professions, this is not universal. Despite pharmacists having  
538 achieved independent prescribing rights in 2006, it would appear from the repeated  
539 policy documents describing the need for pharmacist prescribers that it is still not  
540 embedded into pharmacists' routine practice. Medicines remain at the core of  
541 pharmacy practice through supply and optimisation but, until the new roles become  
542 established, prescribing has yet to be perceived as a 'normal' pharmacist activity.

543 This review has also highlighted the impact that a change in government can have, as  
544 shown by the gap in policy document publication during the Coalition's review and  
545 reorganisation of the NHS, and the delays in legislation concerning controlled drugs.  
546 These delays are not inevitable, as shown by the physiotherapist and podiatrist  
547 consultations which were conducted during this period.

548 While these findings concern a publicly funded health service in a single country, and  
549 may therefore be considered to have limited generalisability, there are messages  
550 that may resonate in other settings. These concern the impact of reorganisation on  
551 service development and how uptake of a novel skill is adopted by professions.

## 552 **References**

- 553 1. Cumberlege J. Neighbourhood nursing: a focus for care. The Cumberlege  
554 Report. London: HMSO1986.
- 555 2. Crown J. Review of prescribing, supply and administration of medicines. Final  
556 report. London: Department of Health1999. Available from:  
557 [http://webarchive.nationalarchives.gov.uk/20130105143320/http://www.dh.gov.uk](http://webarchive.nationalarchives.gov.uk/20130105143320/http://www.dh.gov.uk/prod_consum_dh/groups/dh_digitalassets/@dh/@en/documents/digitalasset/dh_4077153.pdf)  
558 [/prod\\_consum\\_dh/groups/dh\\_digitalassets/@dh/@en/documents/digitalasset/dh\\_](http://webarchive.nationalarchives.gov.uk/20130105143320/http://www.dh.gov.uk/prod_consum_dh/groups/dh_digitalassets/@dh/@en/documents/digitalasset/dh_4077153.pdf)  
559 [4077153.pdf](http://webarchive.nationalarchives.gov.uk/20130105143320/http://www.dh.gov.uk/prod_consum_dh/groups/dh_digitalassets/@dh/@en/documents/digitalasset/dh_4077153.pdf).
- 560 3. Greengross P, Grant K, Collini E. The History and Development of The UK  
561 National Health Service 1948 - 1999. London: DFID Health Systems Resource  
562 Centre1999. Available from:

563 <https://assets.publishing.service.gov.uk/media/57a08d91e5274a31e000192c/The->  
564 [history-and-development-of-the-UK-NHS.pdf](#).

565 4. The history of NHS reform: Nuffield Trust; (no date) [cited 4 July 2018].

566 Available from: <http://nhstimeline.nuffieldtrust.org.uk/>.

567 5. Department of Health. The NHS Plan - a plan for investment, a plan for

568 reform. London: The Stationery Office Limited; 2000. Available from:

569 [www.dh.gov.uk/prod\\_consum\\_dh/groups/dh\\_digitalassets/@dh/@en/@ps/docume](http://www.dh.gov.uk/prod_consum_dh/groups/dh_digitalassets/@dh/@en/@ps/documents/digitalasset/dh_118522.pdf)  
570 [nts/digitalasset/dh\\_118522.pdf](#).

571 6. NHS Modernisation Agency and Affiliated Programmes (no date) [cited 20

572 August 2018]. Available from:

573 <http://webarchive.nationalarchives.gov.uk/+http://www.dh.gov.uk/en/Publications>  
574 [andstatistics/Publications/PublicationsPolicyAndGuidance/Browsable/DH\\_4991386](#).

575 7. Department of Health. Consultation on proposals to extend nurse

576 prescribing. 2000. Available from:

577 <http://webarchive.nationalarchives.gov.uk/20040803061541/http://www.dh.gov.uk>  
578 [/assetRoot/04/06/82/27/04068227.pdf](#).

579 8. Groundbreaking new consultation aims to extend prescribing powers for

580 pharmacists and nurses [Internet]. London; 2002; 16 April 2002 [cited 30 October

581 2018]. Available from:

582 <http://webarchive.nationalarchives.gov.uk/20051012062254/http://www.dh.gov.uk>

583 [/PublicationsAndStatistics/PressReleases/PressReleasesNotices/fs/en?CONTENT\\_ID=](#)  
584 [4013114&chk=JkprtS](#)

585 9. Pharmacists to prescribe for the first time nurses will prescribe for chronic  
586 illness [Internet]. London; 2002; 21 November 2002 [cited 30 October 2018].

587 Available from:

588 [http://webarchive.nationalarchives.gov.uk/20051012062249/http://www.dh.gov.uk](#)  
589 [/PublicationsAndStatistics/PressReleases/PressReleasesNotices/fs/en?CONTENT\\_ID=](#)  
590 [4025974&chk=BOhuz1](#)

591 10. Department of Health. Supplementary Prescribing by Nurses, Pharmacists,

592 Chiropodists/Podiatrists, Physiotherapists and Radiographers within the NHS in

593 England: A guide for implementation. London 2005. Report No.: 4941. Available

594 from:

595 [http://webarchive.nationalarchives.gov.uk/20130124065910/http://www.dh.gov.uk](#)  
596 [/prod\\_consum\\_dh/groups/dh\\_digitalassets/@dh/@en/documents/digitalasset/dh](#)  
597 [4110033.pdf](#).

598 11. Medicines & Healthcare Products Regulatory Agency. Consultation on options

599 for the future of independent prescribing by extended formulary nurse prescribers.

600 2005. Available from:

601 [http://webarchive.nationalarchives.gov.uk/20050425224658/http://www.dh.gov.uk](#)  
602 [/Consultations/LiveConsultations/LiveConsultationsArticle/fs/en?CONTENT\\_ID=4104](#)  
603 [057&chk=xNuvDV](#).



- 604 12. Medicines & Healthcare Products Regulatory Agency. Consultation on  
605 proposals to introduce independent prescribing by pharmacists. 2005. Available  
606 from:  
607 [http://webarchive.nationalarchives.gov.uk/20141008042455/http://www.mhra.gov.](http://webarchive.nationalarchives.gov.uk/20141008042455/http://www.mhra.gov.uk/home/groups/comms-ic/documents/websiteresources/con007684.pdf)  
608 [uk/home/groups/comms-ic/documents/websiteresources/con007684.pdf](http://webarchive.nationalarchives.gov.uk/20141008042455/http://www.mhra.gov.uk/home/groups/comms-ic/documents/websiteresources/con007684.pdf).
- 609 13. The National Health Service (Miscellaneous Amendments Relating to  
610 Independent Prescribing) Regulations 2006, Stat. 913 (1 May 2006).
- 611 14. NHS England. Better treatment for patients as advanced paramedics  
612 prescribe medicines 2018 [cited 26 April 2018]. Available from:  
613 <https://www.england.nhs.uk/2018/03/paramedic-prescribing/>.
- 614 15. NHS England. The NHS belongs to the people: A call to action. London 2013.  
615 Available from: [https://www.england.nhs.uk/wp-content/uploads/2013/07/nhs-](https://www.england.nhs.uk/wp-content/uploads/2013/07/nhs-belongs.pdf)  
616 [belongs.pdf](https://www.england.nhs.uk/wp-content/uploads/2013/07/nhs-belongs.pdf).
- 617 16. NHS England. Five Year Forward View 2014 24 October 2014. Available from:  
618 <https://www.england.nhs.uk/wp-content/uploads/2014/10/5yfv-web.pdf>.
- 619 17. Moher D, Shamseer L, Clarke M, Ghersi D, Liberati A, Petticrew M, et al.  
620 Preferred reporting items for systematic review and meta-analysis protocols (   
621 PRISMA-P ) 2015 statement. *Systematic Reviews*. 2015;4(1):1-9. Epub 2015/01/03.  
622 doi: 10.1186/2046-4053-4-1.

- 623 18. Moher D, Liberati A, Tetzlaff J, Altman DG, Group TP. Preferred Reporting  
624 Items for Systematic Reviews and Meta-Analyses: The PRISMA Statement. PLOS  
625 Med. 2009;6(7):e1000097. Epub 2009/07/22. doi: 10.1371/ journal.pmed.1000097.
- 626 19. Greenhalgh T, Peacock R. Effectiveness and efficiency of search methods in  
627 systematic reviews of complex evidence: audit of primary sources. BMJ.  
628 2005;331(7524):1064-5. Epub 2005/10/19. doi: 10.1136/bmj.38636.593461.68.
- 629 20. Liberati A, Altman DG, Tetzlaff J, Mulrow C, Gotzsche PC, Ioannidis JP, et al.  
630 The PRISMA statement for reporting systematic reviews and meta-analyses of  
631 studies that evaluate health care interventions: explanation and elaboration. PLOS  
632 Med. 2009;6(7):e1000100. Epub 2009/07/22. doi: 10.1371/journal.pmed.1000100.
- 633 21. Popay J, Roberts H, Sowden A, Petticrew M, Arai L, Rodgers M, et al.  
634 Guidance on the Conduct of Narrative Synthesis in Systematic Reviews. ESRC  
635 Methods Programme2006.
- 636 22. Booth A, Noyes J, Flemming K, Gerhardus A, Wahlster P, van der Wilt GJ, et  
637 al. Guidance on choosing qualitative evidence synthesis methods for use in health  
638 technology assessments of complex interventions [online]. 2016. Available from:  
639 <http://www.integrate-hta.eu/downloads/>.
- 640 23. Department of Health. Improving Patients' Access to Medicines: A Guide to  
641 Implementing Nurse and Pharmacist Independent Prescribing within the NHS in  
642 England. Leeds 2006. Available from:  
643 <http://webarchive.nationalarchives.gov.uk/20130107105354/http://www.dh.gov.uk/>

644 [prod\\_consum\\_dh/groups/dh\\_digitalassets/@dh/@en/documents/digitalasset/dh\\_4](https://webarchive.nationalarchives.gov.uk/20091106163742/http://www.dh.gov.uk/dr_consum_dh/groups/dh_digitalassets/@dh/@en/documents/digitalasset/dh_4133747.pdf)  
645 [133747.pdf](https://webarchive.nationalarchives.gov.uk/20091106163742/http://www.dh.gov.uk/dr_consum_dh/groups/dh_digitalassets/@dh/@en/documents/digitalasset/dh_4133747.pdf).

646 24. Department of Health. Medicines Matters. A guide to mechanisms for the  
647 prescribing, supply and administration of medicines. London 2006. Available from:  
648 [https://webarchive.nationalarchives.gov.uk/20091106163742/http://www.dh.gov.u](https://webarchive.nationalarchives.gov.uk/20091106163742/http://www.dh.gov.uk/dr_consum_dh/groups/dh_digitalassets/@dh/@en/documents/digitalasset/dh_064326.pdf)  
649 [k/dr\\_consum\\_dh/groups/dh\\_digitalassets/@dh/@en/documents/digitalasset/dh\\_06](https://webarchive.nationalarchives.gov.uk/20091106163742/http://www.dh.gov.uk/dr_consum_dh/groups/dh_digitalassets/@dh/@en/documents/digitalasset/dh_064326.pdf)  
650 [4326.pdf](https://webarchive.nationalarchives.gov.uk/20091106163742/http://www.dh.gov.uk/dr_consum_dh/groups/dh_digitalassets/@dh/@en/documents/digitalasset/dh_064326.pdf).

651 25. NHS Scotland. Guidance for Nurse Independent Prescribers and for  
652 Community Practitioner Nurse Prescribers in Scotland. Edinburgh 2006. Available  
653 from: <https://www.gov.scot/Publications/2006/08/23133351/0>.

654 26. Department of Health, Social Services and Public Safety. Improving Patients'  
655 Access to Medicines: A Guide to Implementing Nurse and Pharmacist Independent  
656 Prescribing within the HPSS in Northern Ireland. Belfast 2006. Report No.: 104/06.  
657 Available from:  
658 [https://www.publichealth.hscni.net/sites/default/files/directorates/files/Guide%20t](https://www.publichealth.hscni.net/sites/default/files/directorates/files/Guide%20to%20implementing%20nurse%20and%20pharmacist%20independent%20prescribing%20in%20NI_0.pdf)  
659 [o%20implementing%20nurse%20and%20pharmacist%20independent%20prescribin](https://www.publichealth.hscni.net/sites/default/files/directorates/files/Guide%20to%20implementing%20nurse%20and%20pharmacist%20independent%20prescribing%20in%20NI_0.pdf)  
660 [g%20in%20NI\\_0.pdf](https://www.publichealth.hscni.net/sites/default/files/directorates/files/Guide%20to%20implementing%20nurse%20and%20pharmacist%20independent%20prescribing%20in%20NI_0.pdf).

661 27. Commission for Healthcare Audit and Inspection. The best medicine: the  
662 management of medicines in acute and specialist trusts. London; January 2007 2007.  
663 Available from:  
664 [https://webarchive.nationalarchives.gov.uk/20081203024742/http://www.healthcar](https://webarchive.nationalarchives.gov.uk/20081203024742/http://www.healthcarecommission.org.uk/db/documents/The_Best_Medicine_acute_trust_tagged.pdf)  
665 [ecommission.org.uk/db/documents/The\\_Best\\_Medicine\\_acute\\_trust\\_tagged.pdf](https://webarchive.nationalarchives.gov.uk/20081203024742/http://www.healthcarecommission.org.uk/db/documents/The_Best_Medicine_acute_trust_tagged.pdf).

- 666 28. National Institute for Mental Health in England National Workforce  
667 Programme. Mental Health: New Ways of Working for Everyone. Progress Report.  
668 London 2007. Available from:  
669 [http://webarchive.nationalarchives.gov.uk/+www.dh.gov.uk/prod\\_consum\\_dh/gro](http://webarchive.nationalarchives.gov.uk/+www.dh.gov.uk/prod_consum_dh/groups/dh_digitalassets/@dh/@en/documents/digitalasset/dh_074495.pdf)  
670 [ups/dh\\_digitalassets/@dh/@en/documents/digitalasset/dh\\_074495.pdf](http://webarchive.nationalarchives.gov.uk/+www.dh.gov.uk/prod_consum_dh/groups/dh_digitalassets/@dh/@en/documents/digitalasset/dh_074495.pdf).
- 671 29. Pharmaceutical Division. Non medical prescribing in Wales - A guide for  
672 implementation. Cardiff 2007. Available from:  
673 [https://webarchive.nationalarchives.gov.uk/20081112234902/http://www.wales.nh](https://webarchive.nationalarchives.gov.uk/20081112234902/http://www.wales.nhs.uk/sites3/page.cfm?orgid=371&pid=21001)  
674 [s.uk/sites3/page.cfm?orgid=371&pid=21001](https://webarchive.nationalarchives.gov.uk/20081112234902/http://www.wales.nhs.uk/sites3/page.cfm?orgid=371&pid=21001).
- 675 30. National Institute for Mental Health in England National Workforce  
676 Programme. New Ways of Working for Everyone: A best practice implementation  
677 guide. London 2007. Available from:  
678 [http://webarchive.nationalarchives.gov.uk/20130105064321/http://www.dh.gov.uk](http://webarchive.nationalarchives.gov.uk/20130105064321/http://www.dh.gov.uk/prod_consum_dh/groups/dh_digitalassets/@dh/@en/documents/digitalasset/dh_079106.pdf)  
679 [/prod\\_consum\\_dh/groups/dh\\_digitalassets/@dh/@en/documents/digitalasset/dh](http://webarchive.nationalarchives.gov.uk/20130105064321/http://www.dh.gov.uk/prod_consum_dh/groups/dh_digitalassets/@dh/@en/documents/digitalasset/dh_079106.pdf)  
680 [079106.pdf](http://webarchive.nationalarchives.gov.uk/20130105064321/http://www.dh.gov.uk/prod_consum_dh/groups/dh_digitalassets/@dh/@en/documents/digitalasset/dh_079106.pdf).
- 681 31. Primary Care Division. Consultation on A Safe Prescription: Developing Nurse,  
682 Midwife and Allied Health Profession (NMAHP) Prescribing in NHS Scotland.  
683 Edinburgh 2007. Available from:  
684 <https://www.gov.scot/Publications/2007/11/08120246/0>.
- 685 32. Department of Health. Pharmacy in England: Building on strengths –  
686 delivering the future. Norwich: The Stationery Office; 2008. Available from:

687 [https://www.gov.uk/government/publications/pharmacy-in-england-building-on-  
strengths-delivering-the-future](https://www.gov.uk/government/publications/pharmacy-in-england-building-on-<br/>688 strengths-delivering-the-future).

689 33. Marks D. Allied health professions prescribing and medicines supply  
690 mechanisms scoping project report. Leeds: Department of Health 2009. Report No.:  
691 Gateway ref: 12185. Available from:  
692 [http://webarchive.nationalarchives.gov.uk/20130107105354/http://www.dh.gov.uk  
/prod\\_consum\\_dh/groups/dh\\_digitalassets/documents/digitalasset/dh\\_103949.pdf](http://webarchive.nationalarchives.gov.uk/20130107105354/http://www.dh.gov.uk<br/>693 /prod_consum_dh/groups/dh_digitalassets/documents/digitalasset/dh_103949.pdf).

694 34. NHS Scotland. A safe prescription; Developing nurse, midwife and allied  
695 health profession (NMAHP) prescribing in NHS Scotland. Edinburgh 2009. Available  
696 from: <https://www2.gov.scot/Resource/Doc/286359/0087194.pdf>.

697 35. Medical Education England. Pharmacist Prescriber Training Working Group  
698 Report for the MPC Programme Board. 2010. Available from:  
699 [https://webarchive.nationalarchives.gov.uk/20160509163634/https://www.hee.nhs  
.uk/sites/default/files/documents/Modernising%20Pharmacy%20Careers%20Progra  
mme%20Report%202010.pdf](https://webarchive.nationalarchives.gov.uk/20160509163634/https://www.hee.nhs<br/>700 .uk/sites/default/files/documents/Modernising%20Pharmacy%20Careers%20Progra<br/>701 mme%20Report%202010.pdf).

702 36. The Scottish Government. Prescription for Excellence. Edinburgh 2013.  
703 Available from: <https://www.gov.scot/resource/0043/00434053.pdf>.

704 37. Smith J, Picton C, Dayan M. Now or never: shaping pharmacy for the future.  
705 London: The Royal Pharmaceutical Society; November 2013. Available from:  
706 [https://www.rpharms.com/Portals/0/RPS%20document%20library/Open%20access/  
Publications/Now%20or%20Never%20-%20Report.pdf](https://www.rpharms.com/Portals/0/RPS%20document%20library/Open%20access/<br/>707 Publications/Now%20or%20Never%20-%20Report.pdf).

- 708 38. Royal Pharmaceutical Society. Seven Day Services in Hospital Pharmacy:  
709 Giving patients the care they deserve. London 2014. Available from:  
710 [https://www.rpharms.com/Portals/0/RPS%20document%20library/Open%20access/  
711 Professional%20standards/Professional%20standards%20for%20Hospital%20pharm  
712 acy/rps-seven-day-report.pdf.](https://www.rpharms.com/Portals/0/RPS%20document%20library/Open%20access/Professional%20standards/Professional%20standards%20for%20Hospital%20pharmacy/rps-seven-day-report.pdf)
- 713 39. NHS Wales. Our Plan for Primary Care in Wales up to March 2018. 2014.  
714 Available from:  
715 [http://www.wales.nhs.uk/sitesplus/documents/986/our%20plan%20for%20primary  
716 %20care%20in%20wales%20up%20to%20march%202018.pdf.](http://www.wales.nhs.uk/sitesplus/documents/986/our%20plan%20for%20primary%20care%20in%20wales%20up%20to%20march%202018.pdf)
- 717 40. Health Education England. The future of primary care: Creating teams for  
718 tomorrow. July 2015. Available from:  
719 [https://www.hee.nhs.uk/sites/default/files/documents/The%20Future%20of%20Pri  
720 mary%20Care%20report.pdf.](https://www.hee.nhs.uk/sites/default/files/documents/The%20Future%20of%20Primary%20Care%20report.pdf)
- 721 41. NHS England. Transformation of seven day clinical pharmacy services in acute  
722 hospitals. 5 September 2016 2016. Report No.: Gateway ref: 5764. Available from:  
723 [https://www.england.nhs.uk/wp-content/uploads/2016/09/7ds-clinical-pharmacy-  
724 acute-hosp.pdf.](https://www.england.nhs.uk/wp-content/uploads/2016/09/7ds-clinical-pharmacy-acute-hosp.pdf)
- 725 42. Royal Pharmaceutical Society. Improving care for people with Long Term  
726 Conditions. London; November 2016. Available from:  
727 [https://www.rpharms.com/Portals/0/RPS%20document%20library/Open%20access/  
728 Policy/LTC%20-%20England.pdf.](https://www.rpharms.com/Portals/0/RPS%20document%20library/Open%20access/Policy/LTC%20-%20England.pdf)

- 729 43. Health Education England. The General Practice Nursing Workforce  
730 Development Plan. March 2017. Available from:  
731 <https://hee.nhs.uk/sites/default/files/documents/The%20general%20practice%20nursing%20workforce%20development%20plan.pdf>.  
732
- 733 44. Public Health England. Facing the Facts, Shaping the Future: A draft health  
734 and care workforce strategy for England to 2027. 2017. Available from:  
735 <https://www.hee.nhs.uk/sites/default/files/documents/Facing%20the%20Facts%20and%20Shaping%20the%20Future%20a%20draft%20health%20and%20care%20workforce%20strategy%20for%20England%20to%202027.pdf>.  
736  
737  
738
- 739 45. Medicines & Healthcare Products Regulatory Agency. Consultation on  
740 proposals to introduce independent prescribing by optometrists. London 2006.  
741 Available from:  
742 [https://webarchive.nationalarchives.gov.uk/20061016154410/http://www.mhra.gov.uk/home/idcplg?IdcService=SS\\_GET\\_PAGE&useSecondary=true&ssDocName=CON2024332&ssTargetNodeId=373](https://webarchive.nationalarchives.gov.uk/20061016154410/http://www.mhra.gov.uk/home/idcplg?IdcService=SS_GET_PAGE&useSecondary=true&ssDocName=CON2024332&ssTargetNodeId=373).  
743  
744
- 745 46. Drug Strategy Unit. Public consultation - independent prescribing of  
746 controlled drugs by nurse and pharmacist independent prescribers. London 2007.  
747 Available from:  
748 <http://webarchive.nationalarchives.gov.uk/20070905223650/http://www.homeoffice.gov.uk/documents/cons-2007-indpres?view=Binary>.  
749

- 750 47. Medicines & Healthcare Products Regulatory Agency. Public consultation  
751 (MLX 334): Proposals to introduce independent prescribing by optometrists -  
752 outcome London 2008 [cited 28 February 2018]. Available from:  
753 [http://webarchive.nationalarchives.gov.uk/20130515160823/http://www.mhra.gov.](http://webarchive.nationalarchives.gov.uk/20130515160823/http://www.mhra.gov.uk/Publications/Consultations/Medicinesconsultations/MLXs/CON2024332?ssSourceNodeid=387)  
754 [uk/Publications/Consultations/Medicinesconsultations/MLXs/CON2024332?ssSourceNodeid=387.](http://webarchive.nationalarchives.gov.uk/20130515160823/http://www.mhra.gov.uk/Publications/Consultations/Medicinesconsultations/MLXs/CON2024332?ssSourceNodeid=387)  
755
- 756 48. Crowther N. Proposals to introduce prescribing responsibilities for  
757 paramedics: stakeholder engagement. London 2010. Available from:  
758 [http://webarchive.nationalarchives.gov.uk/20130105055008/http://www.dh.gov.uk](http://webarchive.nationalarchives.gov.uk/20130105055008/http://www.dh.gov.uk/en/Publicationsandstatistics/Publications/PublicationsPolicyAndGuidance/DH_114355)  
759 [/en/Publicationsandstatistics/Publications/PublicationsPolicyAndGuidance/DH\\_1143](http://webarchive.nationalarchives.gov.uk/20130105055008/http://www.dh.gov.uk/en/Publicationsandstatistics/Publications/PublicationsPolicyAndGuidance/DH_114355)  
760 [55.](http://webarchive.nationalarchives.gov.uk/20130105055008/http://www.dh.gov.uk/en/Publicationsandstatistics/Publications/PublicationsPolicyAndGuidance/DH_114355)
- 761 49. Department of Health. Engagement exercise: To seek views on possibilities  
762 for introducing independent prescribing responsibilities for podiatrists. Leeds 2010.  
763 Available from:  
764 [https://assets.publishing.service.gov.uk/government/uploads/system/uploads/attac](https://assets.publishing.service.gov.uk/government/uploads/system/uploads/attachment_data/file/216033/dh_119374.pdf)  
765 [hment\\_data/file/216033/dh\\_119374.pdf.](https://assets.publishing.service.gov.uk/government/uploads/system/uploads/attachment_data/file/216033/dh_119374.pdf)
- 766 50. Department of Health. Engagement exercise: To seek views on possibilities  
767 for introducing independent prescribing responsibilities for physiotherapists. Leeds  
768 2010. Available from:  
769 [https://assets.publishing.service.gov.uk/government/uploads/system/uploads/attac](https://assets.publishing.service.gov.uk/government/uploads/system/uploads/attachment_data/file/216032/dh_119375.pdf)  
770 [hment\\_data/file/216032/dh\\_119375.pdf.](https://assets.publishing.service.gov.uk/government/uploads/system/uploads/attachment_data/file/216032/dh_119375.pdf)



771 51. Department of Health. Proposals to introduce independent prescribing by  
772 podiatrists: impact assessment. 2011. Available from:  
773 [https://assets.publishing.service.gov.uk/government/uploads/system/uploads/attac](https://assets.publishing.service.gov.uk/government/uploads/system/uploads/attachment_data/file/213480/DH-1019-Proposals-to-introduce-independent-prescribing-by-podiatrists.pdf)  
774 [hment\\_data/file/213480/DH-1019-Proposals-to-introduce-independent-prescribing-](https://assets.publishing.service.gov.uk/government/uploads/system/uploads/attachment_data/file/213480/DH-1019-Proposals-to-introduce-independent-prescribing-by-podiatrists.pdf)  
775 [by-podiatrists.pdf](https://assets.publishing.service.gov.uk/government/uploads/system/uploads/attachment_data/file/213480/DH-1019-Proposals-to-introduce-independent-prescribing-by-podiatrists.pdf).

776 52. Department of Health. Consultation on proposals to introduce independent  
777 prescribing by podiatrists. Leeds 2011. Available from:  
778 [http://webarchive.nationalarchives.gov.uk/20130104224853/http://www.dh.gov.uk](http://webarchive.nationalarchives.gov.uk/20130104224853/http://www.dh.gov.uk/prod_consum_dh/groups/dh_digitalassets/documents/digitalasset/dh_131019.pdf)  
779 [/prod\\_consum\\_dh/groups/dh\\_digitalassets/documents/digitalasset/dh\\_131019.pdf](http://webarchive.nationalarchives.gov.uk/20130104224853/http://www.dh.gov.uk/prod_consum_dh/groups/dh_digitalassets/documents/digitalasset/dh_131019.pdf).

780 53. Department of Health. Consultation on proposals to introduce independent  
781 prescribing by physiotherapists. Leeds 2011. Available from:  
782 [https://consultations.dh.gov.uk/cno-ahp/prescribingmedicines/user\\_uploads/ip-](https://consultations.dh.gov.uk/cno-ahp/prescribingmedicines/user_uploads/ip-consultation-doc-physios.pdf)  
783 [consultation-doc-physios.pdf](https://consultations.dh.gov.uk/cno-ahp/prescribingmedicines/user_uploads/ip-consultation-doc-physios.pdf).

784 54. Commission on Human Medicines. Summary of the Commission on Human  
785 Medicines meeting held on Thursday 17th & Friday 18th May 2012. 2012. Available  
786 from:  
787 [https://webarchive.nationalarchives.gov.uk/20121105181741/http://www.mhra.go](https://webarchive.nationalarchives.gov.uk/20121105181741/http://www.mhra.gov.uk/home/groups/l-cs-el/documents/committeedocument/con172304.pdf)  
788 [v.uk/home/groups/l-cs-el/documents/committeedocument/con172304.pdf](https://webarchive.nationalarchives.gov.uk/20121105181741/http://www.mhra.gov.uk/home/groups/l-cs-el/documents/committeedocument/con172304.pdf).

789 55. Department of Health. Summary of Public Consultation on Proposals to  
790 Introduce Independent Prescribing by Physiotherapists. Leeds 2012. Available from:  
791 [https://www.gov.uk/government/uploads/system/uploads/attachment\\_data/file/21](https://www.gov.uk/government/uploads/system/uploads/attachment_data/file/216881/Physiotherapist-Consultation-Summary.pdf)  
792 [6881/Physiotherapist-Consultation-Summary.pdf](https://www.gov.uk/government/uploads/system/uploads/attachment_data/file/216881/Physiotherapist-Consultation-Summary.pdf).

793 56. Department of Health. Proposals to introduce independent prescribing by  
794 physiotherapists: impact assessment. 2012. Available from:  
795 [https://assets.publishing.service.gov.uk/government/uploads/system/uploads/attac](https://assets.publishing.service.gov.uk/government/uploads/system/uploads/attachment_data/file/213478/DH-1018-Proposals-to-introduce-independent-prescribing-by-physiotherapists1.pdf)  
796 [hment\\_data/file/213478/DH-1018-Proposals-to-introduce-independent-prescribing-](https://assets.publishing.service.gov.uk/government/uploads/system/uploads/attachment_data/file/213478/DH-1018-Proposals-to-introduce-independent-prescribing-by-physiotherapists1.pdf)  
797 [by-physiotherapists1.pdf](https://assets.publishing.service.gov.uk/government/uploads/system/uploads/attachment_data/file/213478/DH-1018-Proposals-to-introduce-independent-prescribing-by-physiotherapists1.pdf).

798 57. Department of Health. Summary of Public Consultation on Proposals to  
799 Introduce Independent Prescribing by Podiatrists. Leeds 2012 Available from:  
800 [https://consultations.dh.gov.uk/cno-ahp/podiatrists-prescribing/results/2900265---](https://consultations.dh.gov.uk/cno-ahp/podiatrists-prescribing/results/2900265---podiatrist-consultation-summary-v1-1-200712.pdf)  
801 [podiatrist-consultation-summary-v1-1-200712.pdf](https://consultations.dh.gov.uk/cno-ahp/podiatrists-prescribing/results/2900265---podiatrist-consultation-summary-v1-1-200712.pdf).

802 58. NHS England. Independent prescribing by radiographers: Impact Assessment.  
803 2015. Available from:  
804 [https://www.engage.england.nhs.uk/consultation/independent-prescribing-](https://www.engage.england.nhs.uk/consultation/independent-prescribing-radiographers/user_uploads/consult-stag-impct-assmnt-radiographer.pdf)  
805 [radiographers/user\\_uploads/consult-stag-impct-assmnt-radiographer.pdf](https://www.engage.england.nhs.uk/consultation/independent-prescribing-radiographers/user_uploads/consult-stag-impct-assmnt-radiographer.pdf).

806 59. Allied Health Professions Medicines Project Team. Consultation on proposals  
807 to introduce independent prescribing by radiographers across the United Kingdom.  
808 2015. Available from:  
809 [https://www.engage.england.nhs.uk/consultation/independent-prescribing-](https://www.engage.england.nhs.uk/consultation/independent-prescribing-radiographers/user_uploads/consult-indepndnt-prescrib-radiographers.pdf)  
810 [radiographers/user\\_uploads/consult-indepndnt-prescrib-radiographers.pdf](https://www.engage.england.nhs.uk/consultation/independent-prescribing-radiographers/user_uploads/consult-indepndnt-prescrib-radiographers.pdf).

811 60. Allied Health Professions Medicines Project Team. Consultation on proposals  
812 to introduce independent prescribing by paramedics across the United Kingdom.  
813 Leeds 2015. Available from:

814 [https://www.engage.england.nhs.uk/consultation/independent-prescribing-](https://www.engage.england.nhs.uk/consultation/independent-prescribing-paramedics/user_uploads/consult-indpdnt-prescrbng-paramedics.pdf)  
815 [paramedics/user\\_uploads/consult-indpdnt-prescrbng-paramedics.pdf](https://www.engage.england.nhs.uk/consultation/independent-prescribing-paramedics/user_uploads/consult-indpdnt-prescrbng-paramedics.pdf).

816 61. NHS England. Proposal to introduce independent prescribing by paramedics:  
817 impact assessment. 2015. Available from:

818 [https://www.engage.england.nhs.uk/consultation/independent-prescribing-](https://www.engage.england.nhs.uk/consultation/independent-prescribing-paramedics/user_uploads/consult-stag-impct-asmnt-paramedics.pdf)  
819 [paramedics/user\\_uploads/consult-stag-impct-asmnt-paramedics.pdf](https://www.engage.england.nhs.uk/consultation/independent-prescribing-paramedics/user_uploads/consult-stag-impct-asmnt-paramedics.pdf).

820 62. Commission on Human Medicines. Summary of The Commission on Human  
821 Medicines Meeting held on Thursday 15 October and Friday 16 October 2015. 2015.

822 Available from:

823 [https://app.box.com/s/jv487awvqzsrq10o34h9gg350ceyd4/1/3477158784/474245](https://app.box.com/s/jv487awvqzsrq10o34h9gg350ceyd4/1/3477158784/47424519277/1)  
824 [19277/1](https://app.box.com/s/jv487awvqzsrq10o34h9gg350ceyd4/1/3477158784/47424519277/1).

825 63. NHS England. Independent prescribing by therapeutic radiographers. 2016.

826 Available from:

827 [https://www.legislation.gov.uk/ukia/2016/38/pdfs/ukia\\_20160038\\_en.pdf](https://www.legislation.gov.uk/ukia/2016/38/pdfs/ukia_20160038_en.pdf).

828 64. Allied Health Professions Medicines Project Team. Summary of the responses

829 to the public consultation on proposals to introduce independent prescribing by

830 paramedics across the United Kingdom. Leeds 2016. Available from:

831 [https://www.england.nhs.uk/wp-content/uploads/2016/02/Paramedics-summary-](https://www.england.nhs.uk/wp-content/uploads/2016/02/Paramedics-summary-consult-responses.pdf)  
832 [consult-responses.pdf](https://www.england.nhs.uk/wp-content/uploads/2016/02/Paramedics-summary-consult-responses.pdf).

833 65. Allied Health Professions Medicines Project Team. Summary of the responses

834 to the public consultation on proposals to introduce independent prescribing by

835 radiographers across the United Kingdom. Leeds 2016. Available from:

836 <https://www.england.nhs.uk/wp-content/uploads/2016/02/radiographers->

837 [summary-consult-responses.pdf](#).

838 66. Commission on Human Medicines. Summary of the Commission on Human

839 Medicines meeting held on Thursday 7th September 2017. 2017. Available from:

840 [https://www.collegeofparamedics.co.uk/downloads/CHM\\_7\\_Sept\\_2017 -](https://www.collegeofparamedics.co.uk/downloads/CHM_7_Sept_2017_-_)

841 [Final\\_Summary\\_Minutes.pdf](#).

842 67. The Medicines for Human Use (Prescribing) (Miscellaneous Amendments)

843 Order 2006, Stat. 915 (1 May 2006).

844 68. NHS Wales. A Planned Primary Care Workforce for Wales: Approach and

845 development actions to be taken in support of the plan for a primary care service in

846 Wales up to 2018. 2015. Available from:

847 <https://gov.wales/docs/dhss/publications/151106plannedprimarycareen.pdf>.

848 69. The Medicines for Human Use (Prescribing) (Miscellaneous Amendments)

849 Order 2008, Stat. 1161 (4 June 2008).

850 70. The Misuse of Drugs (Amendment No. 2) (England, Wales and Scotland)

851 Regulations 2012, Stat. 973 (23 April 2012).

852 71. The Misuse of Drugs (Amendment) Regulations (Northern Ireland) 2012, (10

853 May 2012).

- 854 72. Department of Health. Taking Healthcare to the Patient: Transforming NHS  
855 Ambulance Services. London 2005. Available from:  
856 [https://www.nwas.nhs.uk/media/79142/taking\\_healthcare\\_to\\_the\\_patient\\_1.pdf](https://www.nwas.nhs.uk/media/79142/taking_healthcare_to_the_patient_1.pdf).
- 857 73. NHS England. High quality care for all, now and for future generations:  
858 Transforming urgent and emergency care services in England - Urgent and  
859 Emergency Care Review End of Phase 1 Report. Leeds 2013. Available from:  
860 [https://www.nhs.uk/NHSEngland/keogh-](https://www.nhs.uk/NHSEngland/keogh-review/Documents/UECR.Ph1Report.FV.pdf)  
861 [review/Documents/UECR.Ph1Report.FV.pdf](https://www.nhs.uk/NHSEngland/keogh-review/Documents/UECR.Ph1Report.FV.pdf).
- 862 74. Independent Prescribing by Paramedics to be Recommended for  
863 Implementation 2017 [cited 28 February 2018]. Available from:  
864 [https://www.collegeofparamedics.co.uk/news/independent-prescribing-by-](https://www.collegeofparamedics.co.uk/news/independent-prescribing-by-paramedics-to-be-recommended-for-implementation)  
865 [paramedics-to-be-recommended-for-implementation](https://www.collegeofparamedics.co.uk/news/independent-prescribing-by-paramedics-to-be-recommended-for-implementation).
- 866 75. Department of Health. Equity and Excellence: Liberating the NHS. London:  
867 HMSO; 2010. Available from:  
868 [https://assets.publishing.service.gov.uk/government/uploads/system/uploads/attac](https://assets.publishing.service.gov.uk/government/uploads/system/uploads/attachment_data/file/213823/dh_117794.pdf)  
869 [hment\\_data/file/213823/dh\\_117794.pdf](https://assets.publishing.service.gov.uk/government/uploads/system/uploads/attachment_data/file/213823/dh_117794.pdf).
- 870 76. Health and Social Care Act 2012 (c 7).
- 871 77. H M Treasury. Budget 2010. London: The Stationery Office; 2010. Available  
872 from:  
873 <http://webarchive.nationalarchives.gov.uk/20121003045351/http://www.direct.gov>

874 [.uk/prod\\_consum\\_dg/groups/dg\\_digitalassets/@dg/@en/documents/digitalasset/d](#)  
875 [g\\_188581.pdf](#).

876 78. The 2008 recession 10 years on: Office for National Statistics; 2018 [cited 12  
877 October 2018]. A decade after the beginning of the recession, how has the UK  
878 economy recovered?]. Available from:  
879 [https://www.ons.gov.uk/economy/grossdomesticproductgdp/articles/the2008reces](https://www.ons.gov.uk/economy/grossdomesticproductgdp/articles/the2008recession10yearson/2018-04-30)  
880 [sion10yearson/2018-04-30](https://www.ons.gov.uk/economy/grossdomesticproductgdp/articles/the2008recession10yearson/2018-04-30).

881 79. Stoye G. Does the NHS need more money and how could we pay for it? : The  
882 Health Foundation, the Institute for Fiscal Studies, The King's Fund and the Nuffield  
883 Trust2018. Available from: [https://www.kingsfund.org.uk/sites/default/files/2018-](https://www.kingsfund.org.uk/sites/default/files/2018-06/NHS_at_70_does_the_NHS_need_more_money.pdf)  
884 [06/NHS\\_at\\_70\\_does\\_the\\_NHS\\_need\\_more\\_money.pdf](https://www.kingsfund.org.uk/sites/default/files/2018-06/NHS_at_70_does_the_NHS_need_more_money.pdf).

885 80. Advisory Council on the Misuse of Drugs. Annual Report: Accounting Year  
886 2007 - 2008. London, Home Office 2008. Available from:  
887 [https://assets.publishing.service.gov.uk/government/uploads/system/uploads/attac](https://assets.publishing.service.gov.uk/government/uploads/system/uploads/attachment_data/file/119127/annualreport.pdf)  
888 [hment\\_data/file/119127/annualreport.pdf](https://assets.publishing.service.gov.uk/government/uploads/system/uploads/attachment_data/file/119127/annualreport.pdf).

889 81. The Health Foundation. Staffing matters; funding counts. London 2016.  
890 Available from:  
891 <http://www.health.org.uk/sites/health/files/StaffingMattersFundingCounts.pdf>.

892 82. Commission on Human Medicines. Outcome of the consultation exercise on  
893 proposals for regularising the position of those mixing and administering medicines  
894 in palliative care. 2008. Available from:

895 [http://webarchive.nationalarchives.gov.uk/20141206164734/http://www.mhra.gov.](http://webarchive.nationalarchives.gov.uk/20141206164734/http://www.mhra.gov.uk/home/groups/es-policy/documents/publication/con051813.pdf)

896 [uk/home/groups/es-policy/documents/publication/con051813.pdf](http://webarchive.nationalarchives.gov.uk/20141206164734/http://www.mhra.gov.uk/home/groups/es-policy/documents/publication/con051813.pdf).

897

## 898 **Supporting information**

899 S1 Appendix. PRISMA checklist

900 S2 Appendix. HMIC (Ovid) search strategy

901 S1 Protocol. PROSPERO record

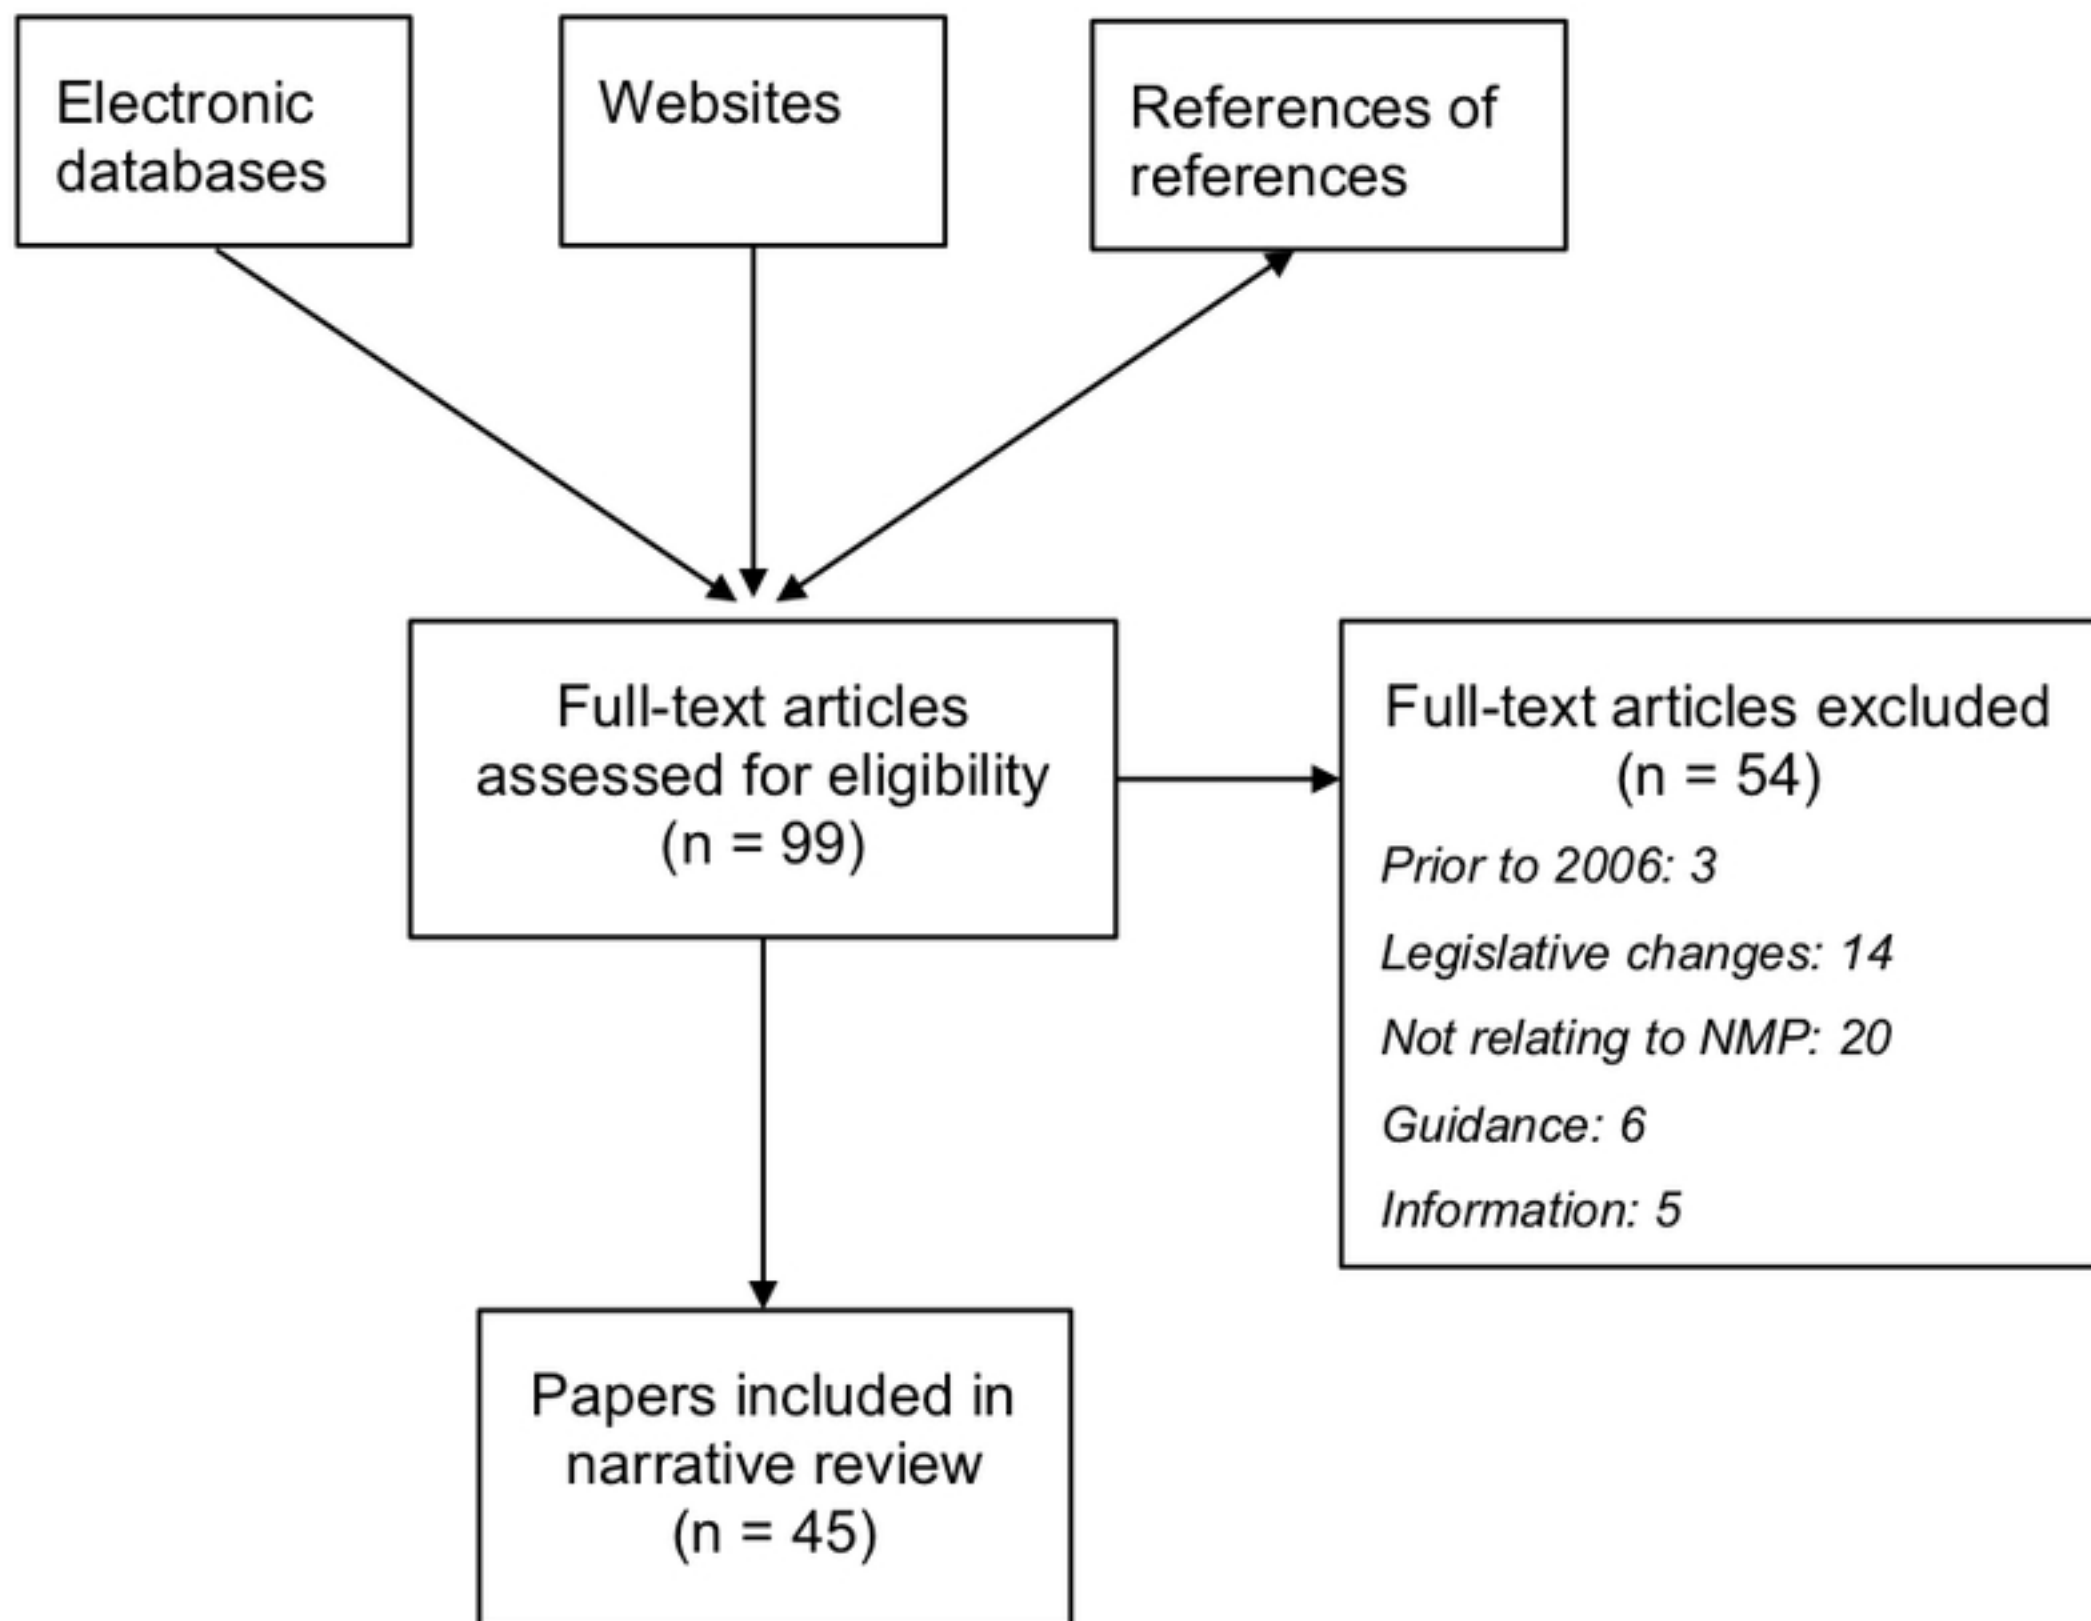



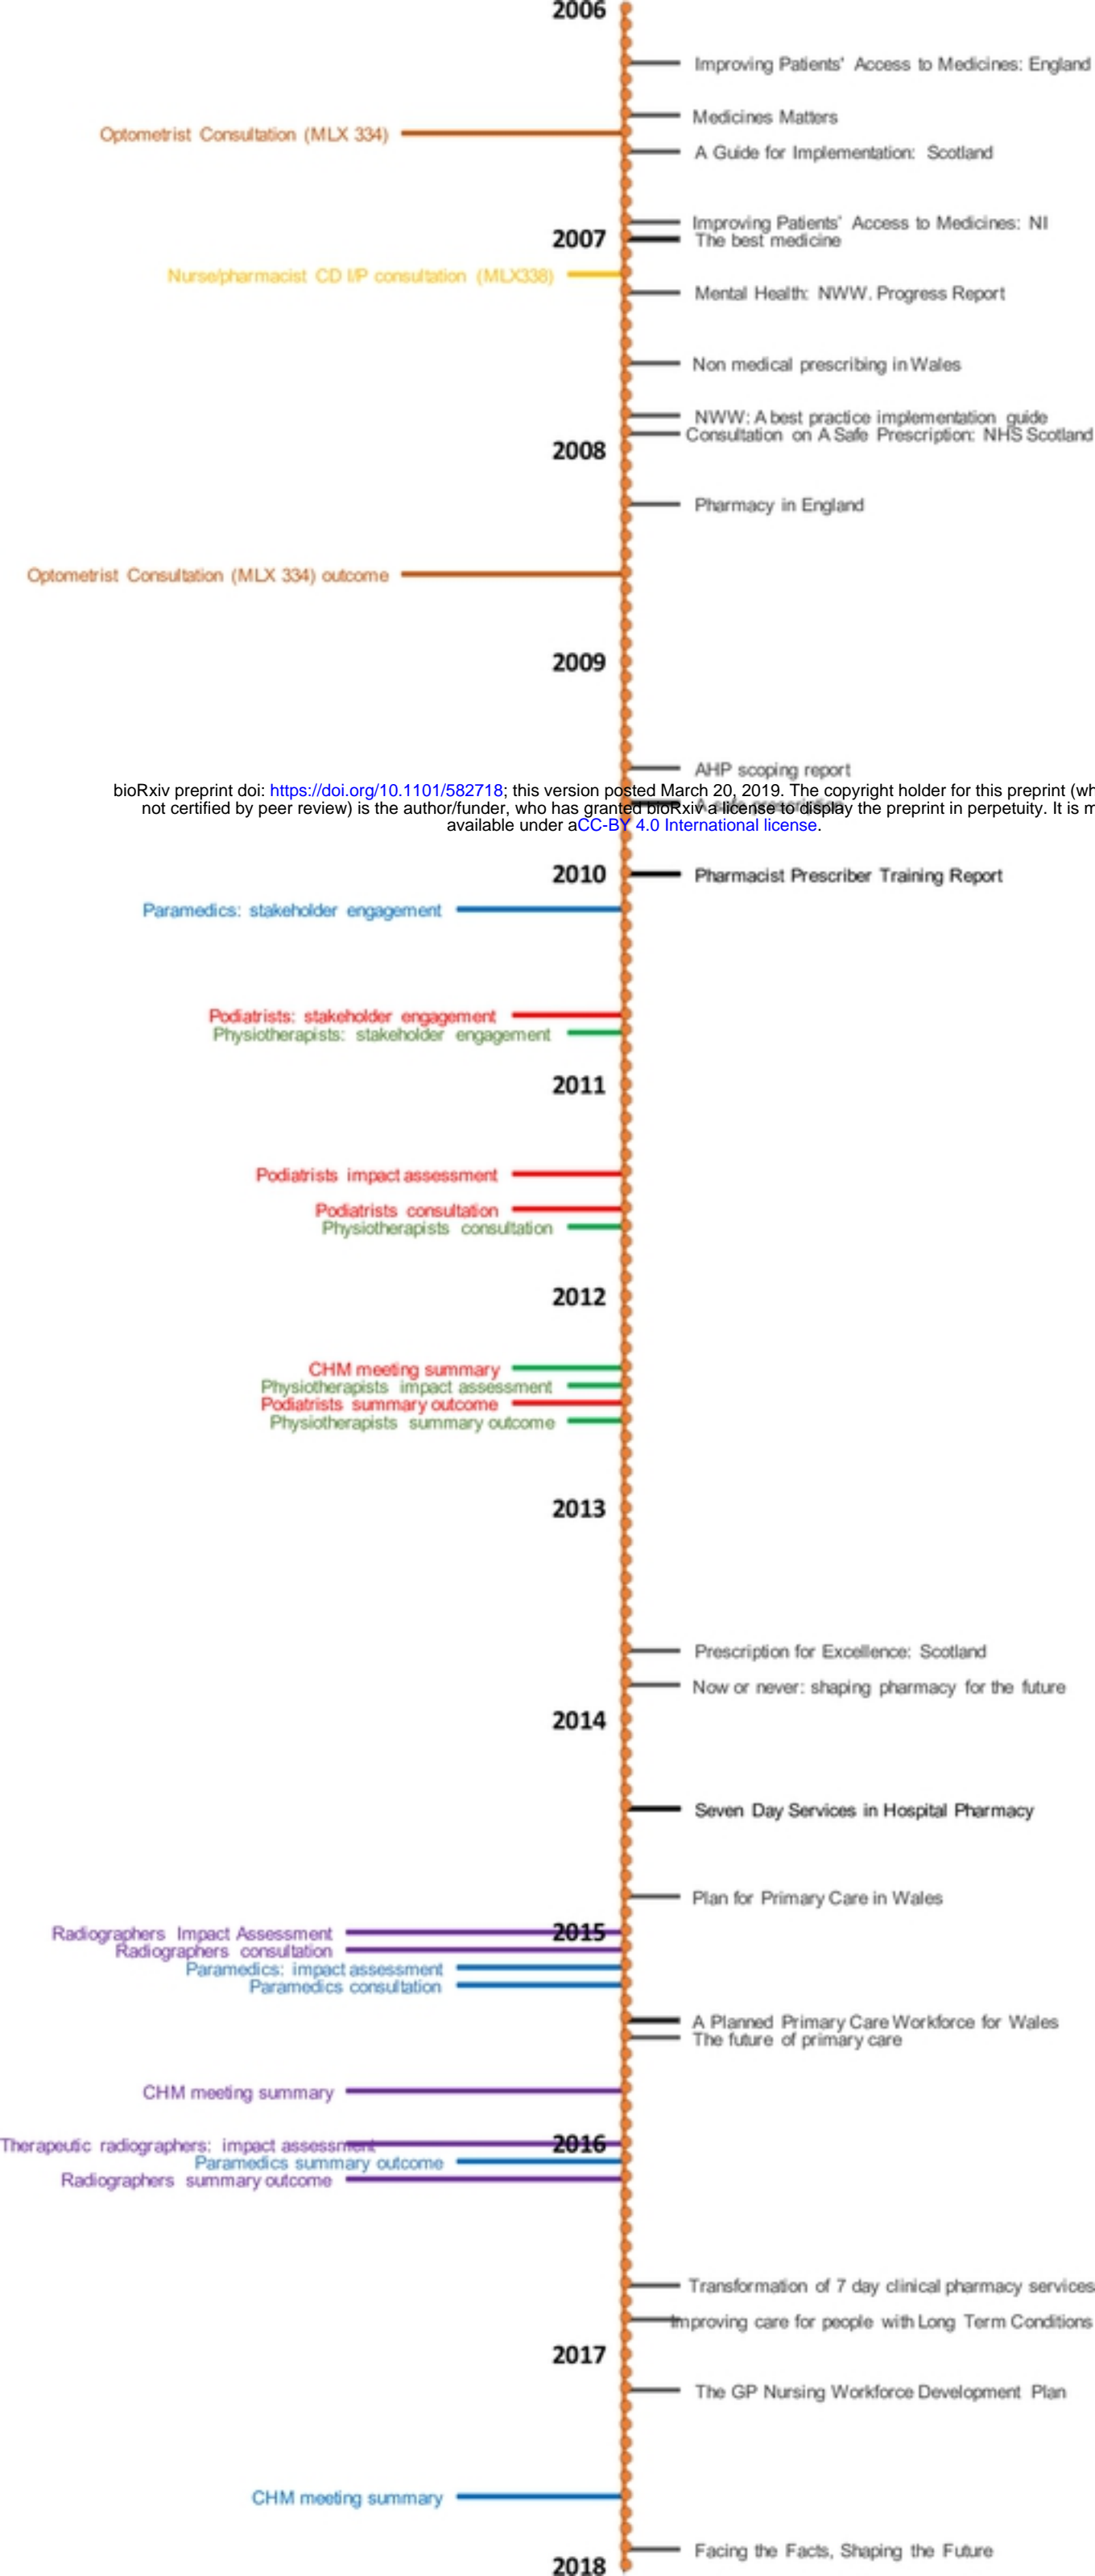

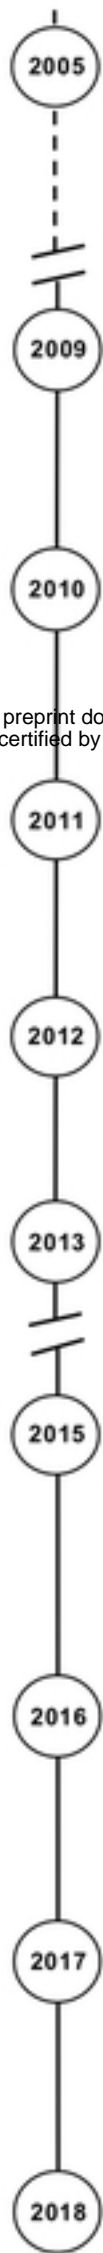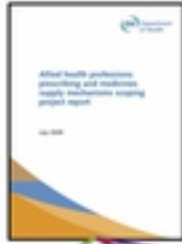

Allied health professions prescribing and medicines supply mechanisms scoping project report

Taking Healthcare to the Patient: Transforming NHS Ambulance Services

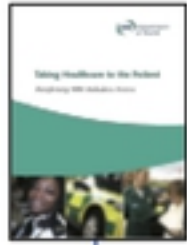

Engagement exercise: independent prescribing by paramedics

Engagement exercise: independent prescribing by physiotherapists

Engagement exercise: independent prescribing by podiatrists

Consultation: independent prescribing by physiotherapists

Impact Assessment: independent prescribing by podiatrists

Consultation: independent prescribing by podiatrists

Summary of the Commission on Human Medicines meeting

Consultation Summary and impact assessment: Independent Prescribing by Physiotherapists

Consultation Summary: Independent Prescribing by Podiatrists

Urgent and Emergency Care Review End of Phase 1 Report

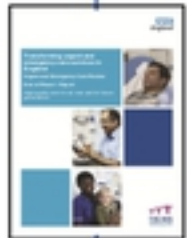

Impact Assessment: independent prescribing by radiographers

Consultation: independent prescribing by radiographers

Consultation and impact assessment: independent prescribing by paramedics

Commission on Human Medicines and Expert Advisory Group Summary

Impact Assessment: Independent prescribing by therapeutic radiographers

Consultation Summary: Independent Prescribing by radiographers

Consultation Summary: Independent Prescribing by paramedics

Summary of the Commission on Human Medicines meeting

bioRxiv preprint doi: <https://doi.org/10.1101/582718>; this version posted March 20, 2019. The copyright holder for this preprint (which was not certified by peer review) is the author/funder, who has granted bioRxiv a license to display the preprint in perpetuity. It is made available under aCC-BY 4.0 International license.
